# Supplementary material for: A tunable human intestinal organoid system achieves controlled balance between self-renewal and differentiation
Source: PubMed Central journal article supplement — Nat Commun. 2025 Jan 2;16:315. doi: 10.1038/s41467-024-55567-2 (PMC11697020; doi:10.1038/s41467-024-55567-2), 2025-01-02
Supplement: 41467_2024_55567_MOESM1_ESM.pdf [file 41467_2024_55567_MOESM1_ESM.pdf]

**A tunable human intestinal organoid system achieves controlled balance  
between self-renewal and differentiation**

Li Yang<sup>1,2,3,#</sup>, Xulei Wang<sup>1,#</sup>, Xingyu Zhou<sup>1</sup>, Hongyu Chen<sup>1</sup>, Sentao Song<sup>4</sup>, Liling Deng<sup>1</sup>,  
Yao Yao<sup>1</sup>, Xiaolei Yin<sup>\*1,2</sup>

**Supplementary Information**

Contents include the following:

Supplementary Figures 1-20

Supplementary Tables 1-4

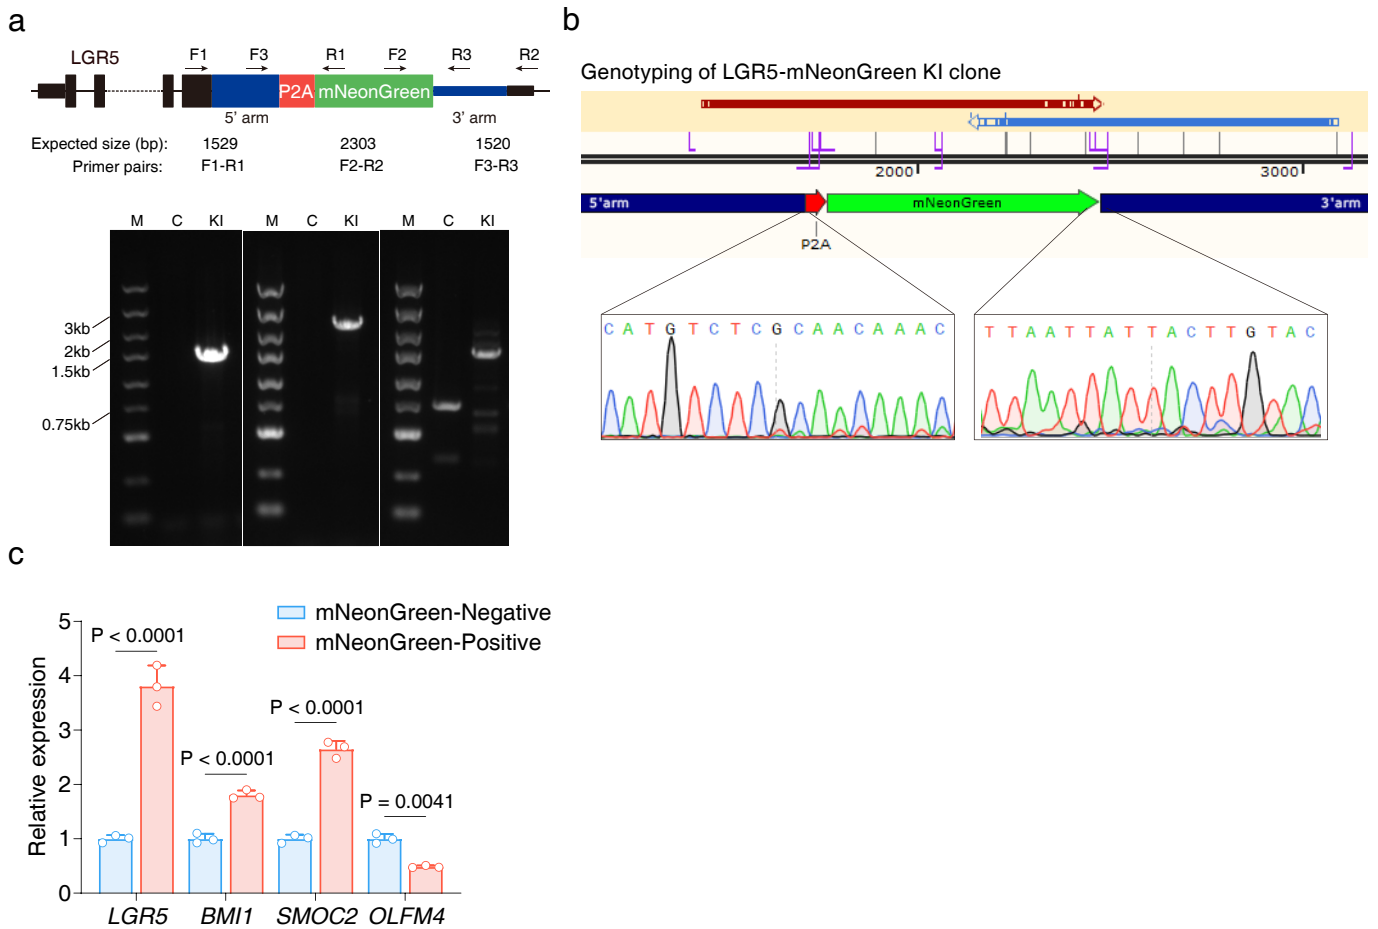

### Supplementary Fig. 1 | Generation of LGR5-mNeonGreen organoids.

**a** Targeting strategy of the generation of LGR5-mNeonGreen reporter in TpC organoids. The upper panel shows the locations of PCR primers, and the lower panel shows gel electrophoresis of PCR products from Knock-in organoids using the indicated primers. Primers pairs F1/R1, F2/R2 and F3/R3 confirm the proper integration of mNeonGreen. Representative blots from three independent experiments. M, size marker; C, control organoid; KI, knock-in organoid. **b** Sequencing traces demonstrating the junction between the LGR5 gene and the knock-in sequence. **c** RT-qPCR quantification of stem cell marker expression levels. Two-way ANOVA analysis with Sidak's multiple comparisons test between mNeonGreen-negative cells and mNeonGreen-positive cells; data are presented as mean  $\pm$  SD; data represents a representative experiment with  $n = 3$  samples per condition. Source data for this Figure are provided as a Source Data file.

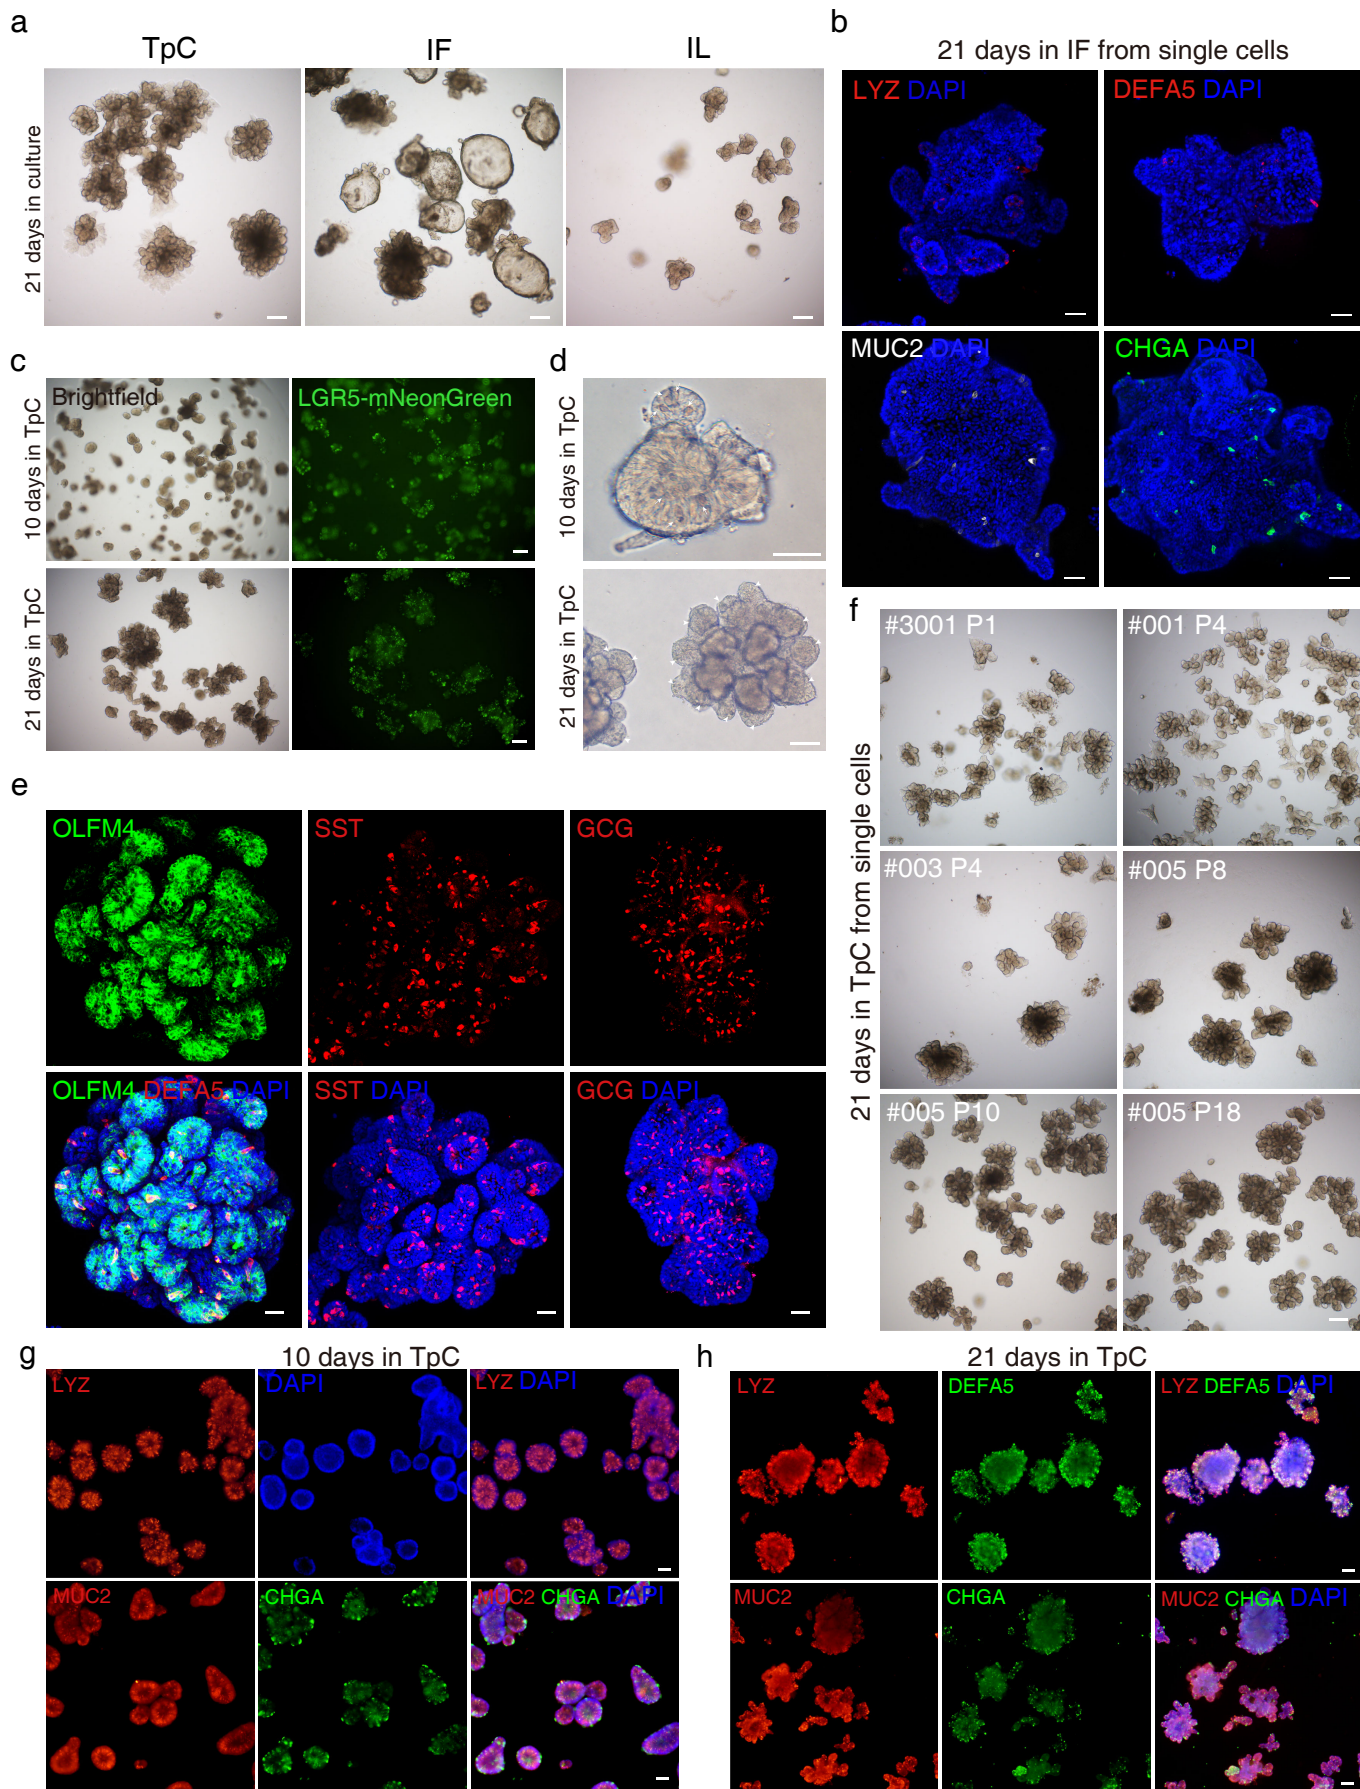

**Supplementary Fig. 2 | TpC organoid demonstrates enhanced stemness and increased cellular diversity.**

**a** Representative brightfield images of organoids cultured in TpC, IF and IL patterning condition for 21 days from single cells. **b** Representative confocal images of Paneth cells (LYZ/DEFA5), goblet cell (MUC2) and EEC (CHGA) in IF condition for 21 days. **c** Representative brightfield and fluorescence images of organoids cultured in TpC condition for 10 and 21 days. **d** Representative images of Paneth-like cells with dark granules (arrows) at day 10 and extensive crypt-like budding structures (arrowheads) at day 21 in TpC organoids. **e** Representative confocal images of stem cell marker OLFM4, Paneth cell marker DEFA5 and enteroendocrine cell subtype markers SST and GCG in TpC organoids. **f** Representative brightfield images of intestinal organoids derived from multiple donors at different passages. **g-h** Uniformly expressed secretory lineage markers (LYZ, DEFA5, MUC2, and CHGA) in each 10 days (**g**) and 24 days (**h**) TpC organoid. All the representative images of this Figure were from at least three independent experiments. Scale bars, (**a, c, d** and **f-h**), 200  $\mu$ M; (**b** and **e**), 50  $\mu$ m.



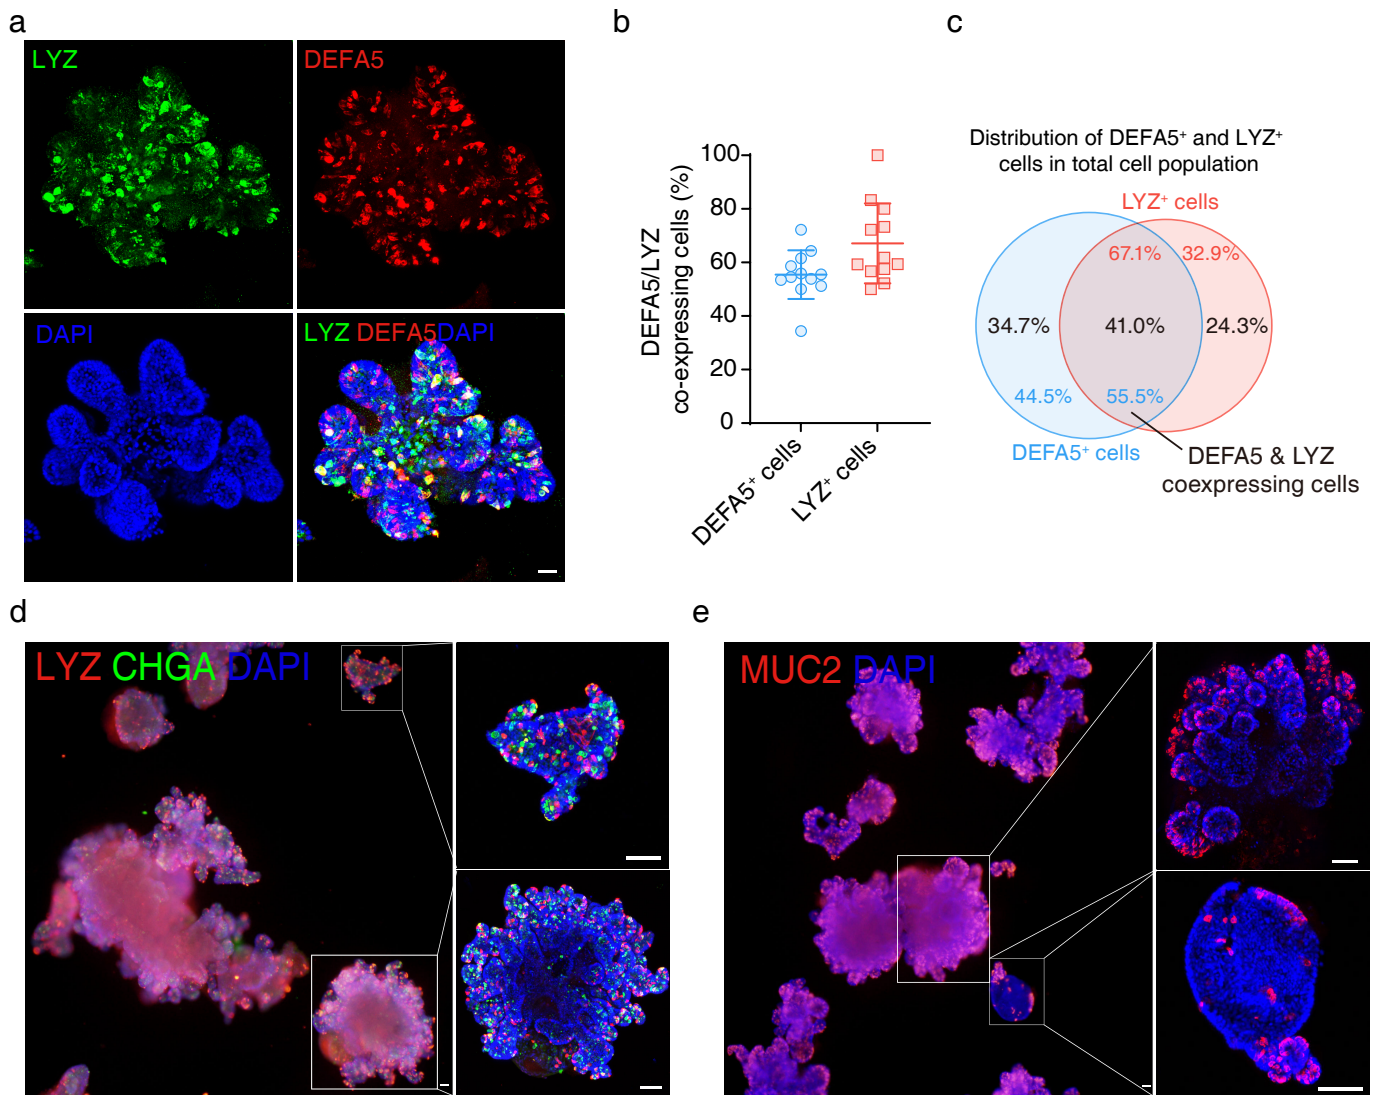

### Supplementary Fig. 3 | Additional characterization of TpC organoids.

**a** Representative fluorescence images of Paneth cell markers (LYZ and DEFA5) in TpC organoids cultured for 21 days. Results reproducible for at least three biological replicates. **b** Quantification of the percentage of cells co-expressing DEFA5 and LYZ within DEFA5<sup>+</sup> and LYZ<sup>+</sup> cell populations.  $n = 12$  samples. Data are presented as mean  $\pm$  SD. Source data are provided as a Source Data file. **c** Venn diagram showing the distribution of DEFA5<sup>+</sup> and LYZ<sup>+</sup> cells in the total cell population that express either DEFA5 or LYZ, highlighting the proportion of cells co-expressing both markers (DEFA5<sup>+</sup> LYZ<sup>+</sup>). **d-e** Immunofluorescence staining of Paneth cells (LYZ) and enteroendocrine cells (CHGA) (**d**), and goblet cells (MUC2) (**e**) in TpC organoids. Images include full views and amplified views of single organoids displaying round and budding structures. Representative images from three independent experiments. Scale bars, 50  $\mu$ m.

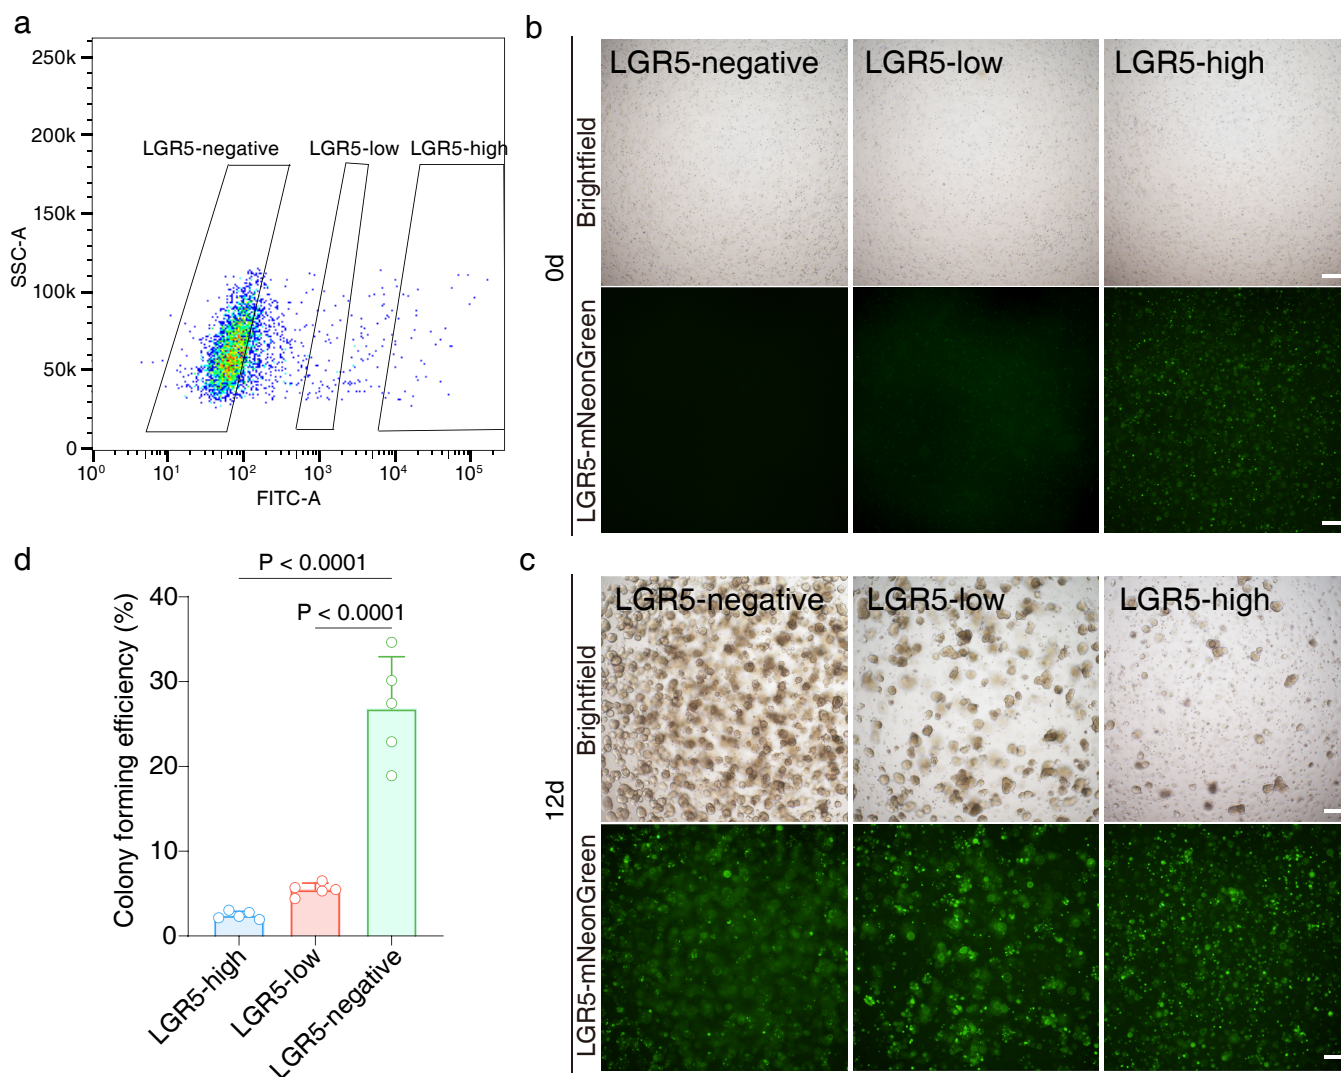

**Supplementary Fig. 4 | TpC organoids originated from LGR5-positive and negative cells.**

**a** FACS gating strategy for sorting LGR5-negative, LGR5-low, and LGR5-high cells in TpC organoids. **b** Brightfield and LGR5-mNeonGreen fluorescence images of cells sorted using the strategy indicated in (a), with 8000 cells seeded per well. **c** Brightfield and fluorescence images of organoids cultured in TpC condition for 12 days from single cells. Representative images of (b and c) from three independent experiments. Scale bar, 200  $\mu\text{m}$ . **d** Quantification of the colony-forming efficiency of LGR5-negative, LGR5-low, and LGR5-high cells. One-way ANOVA with Dunnett's multiple comparisons test compared with LGR5-high cells; data are presented as mean  $\pm$  SD; data represent a representative experiment with  $n = 5$  samples per condition. Source data are provided as a Source Data file.

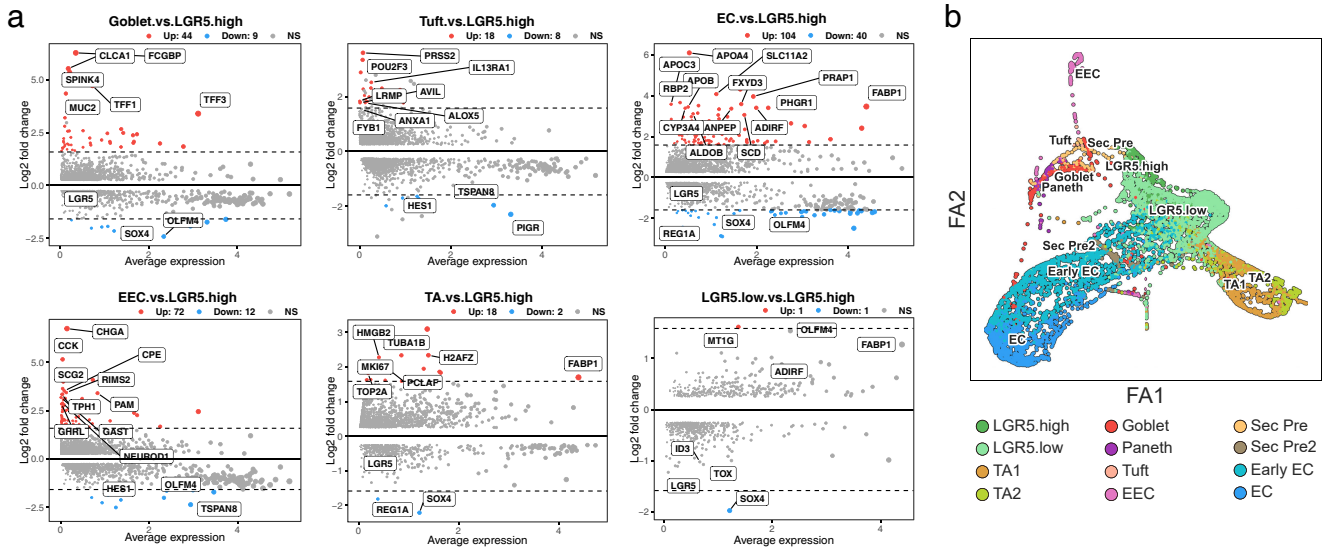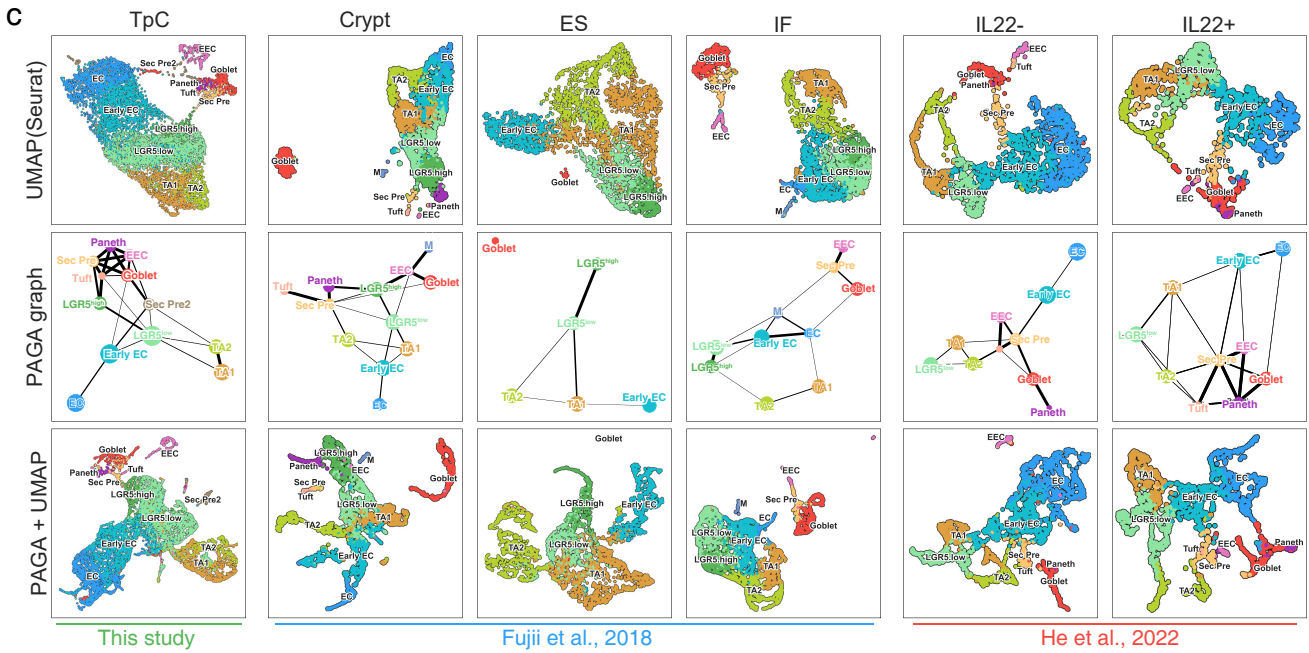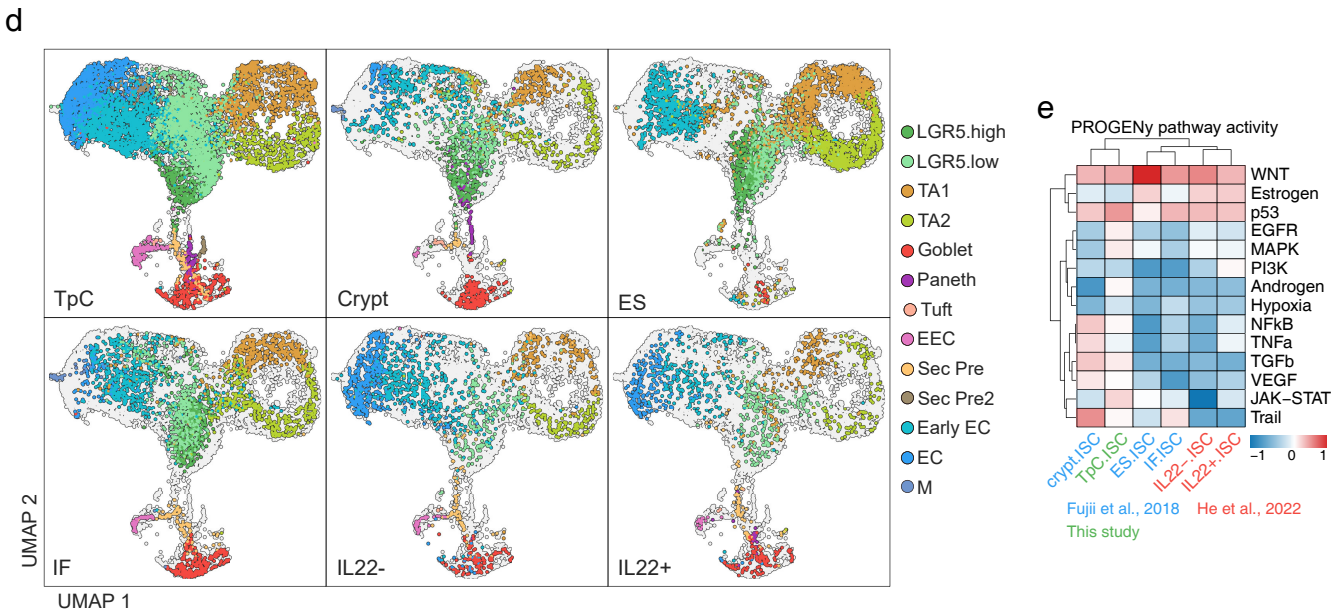

**Supplementary Fig. 5 | scRNA-seq analysis reveals cellular diversity and cell fate dynamics in human intestinal organoids.**

**a** MA plots showing differentially expressed genes between different cell types and LGR5-high cells. **b** Force Atlas plot of TpC organoids from scRNA-seq analysis. **c** UMAP and PAGA trajectory analysis of the scRNA-seq data of ES, IF, IL, TpC organoids, and Crypt showing inferred developmental trajectories of cell types. Circle size indicates cell numbers, and line thickness indicates connectivity strength between clusters. **d** UMAP plot showing integrated analysis of scRNA-seq datasets of cells from ES, IF, IL, TpC organoids, and Crypt using the Seurat package. Clustering reveals distinct cell populations under different conditions. **e** Heatmap showing predicted PROGENy pathway activity of intestinal stem cells (ISCs) in ES, IF, IL, TpC organoids, and Crypt datasets.



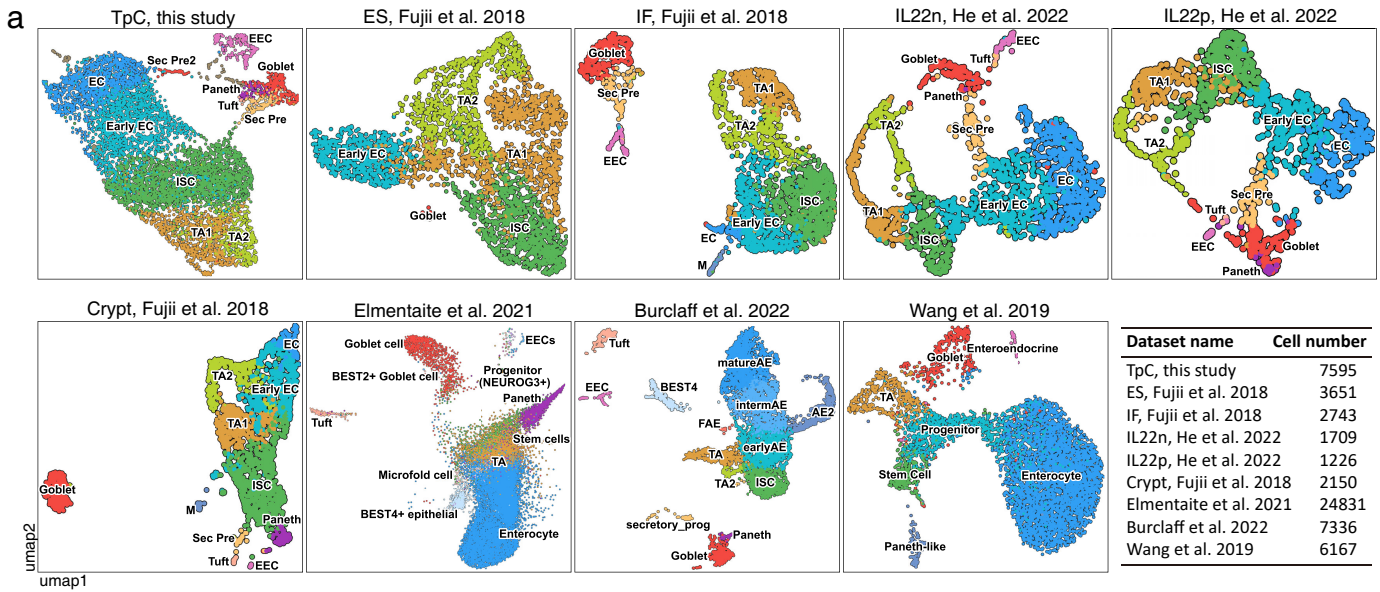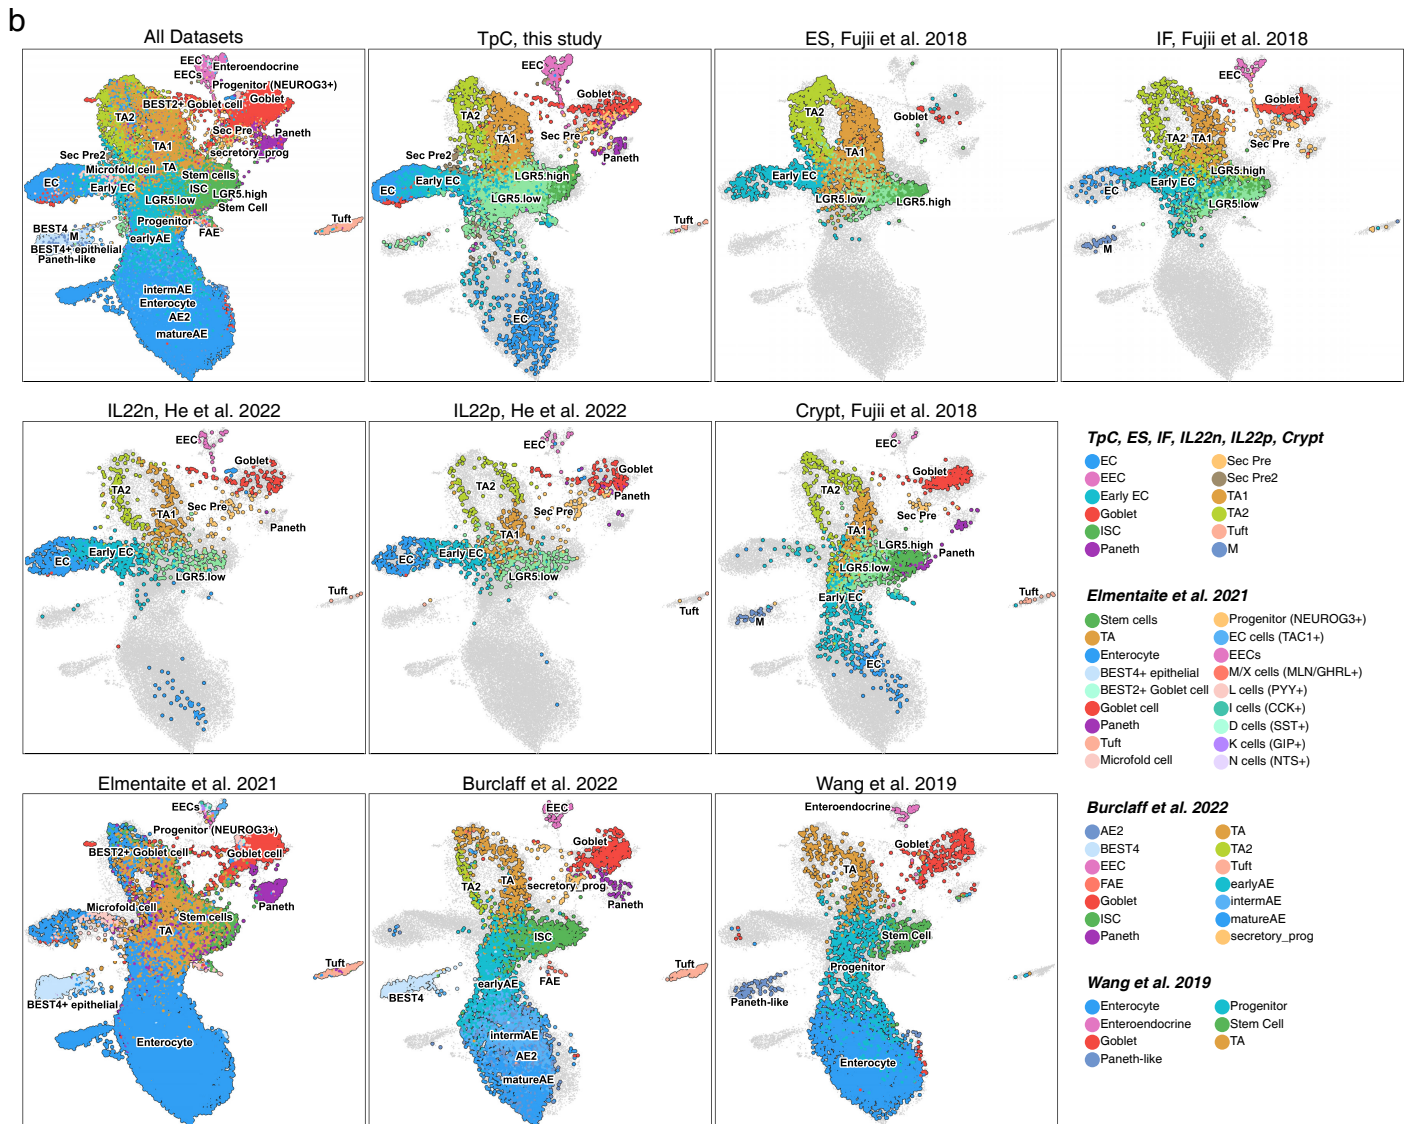

**Supplementary Fig. 6 | Comparison of single-cell datasets from organoid and *in vivo* conditions.**

**a** UMAP plot of single-cell RNA-seq datasets, including organoid datasets from TpC, ES, IF, IL22n, and IL22p conditions, as well as datasets from crypt and *in vivo* sources. Each dataset is annotated according to originally provided annotation, the dataset names and the number of cells analyzed are provided in the accompanying table. **b** Harmony integration of single-cell RNA-seq datasets from organoid and *in vivo* conditions. The integrated UMAP plot shows the combined analysis of all datasets, with cells colored by their original dataset. Each dataset is individually represented to highlight the integration and clustering of similar cell types across different conditions. The legend indicates the color-coding for major cell types and datasets.



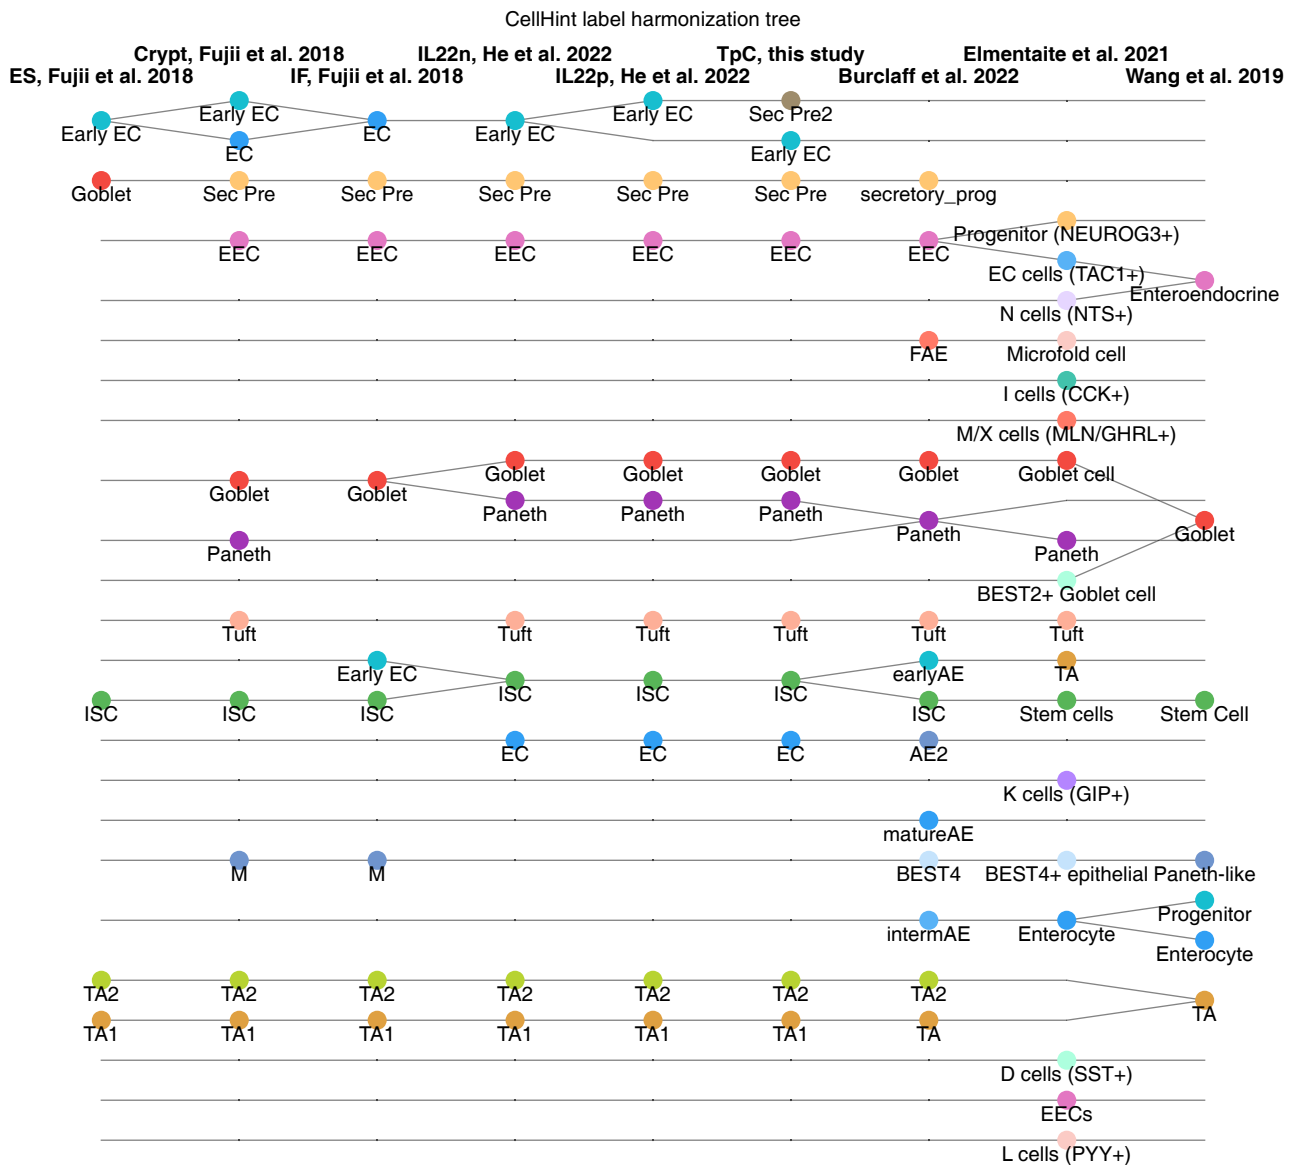

**Supplementary Fig. 7 | CellHint-based harmonization of organoid and *in vivo* single-cell datasets.**

Harmonization graph showing selected cell-type relationships across the organoid and *in vivo* datasets shown on top. Cell-type labels are colored according to their original annotation of cell types. The lines in the graph reflect the connections among transcriptionally similar cell types regardless of their names.

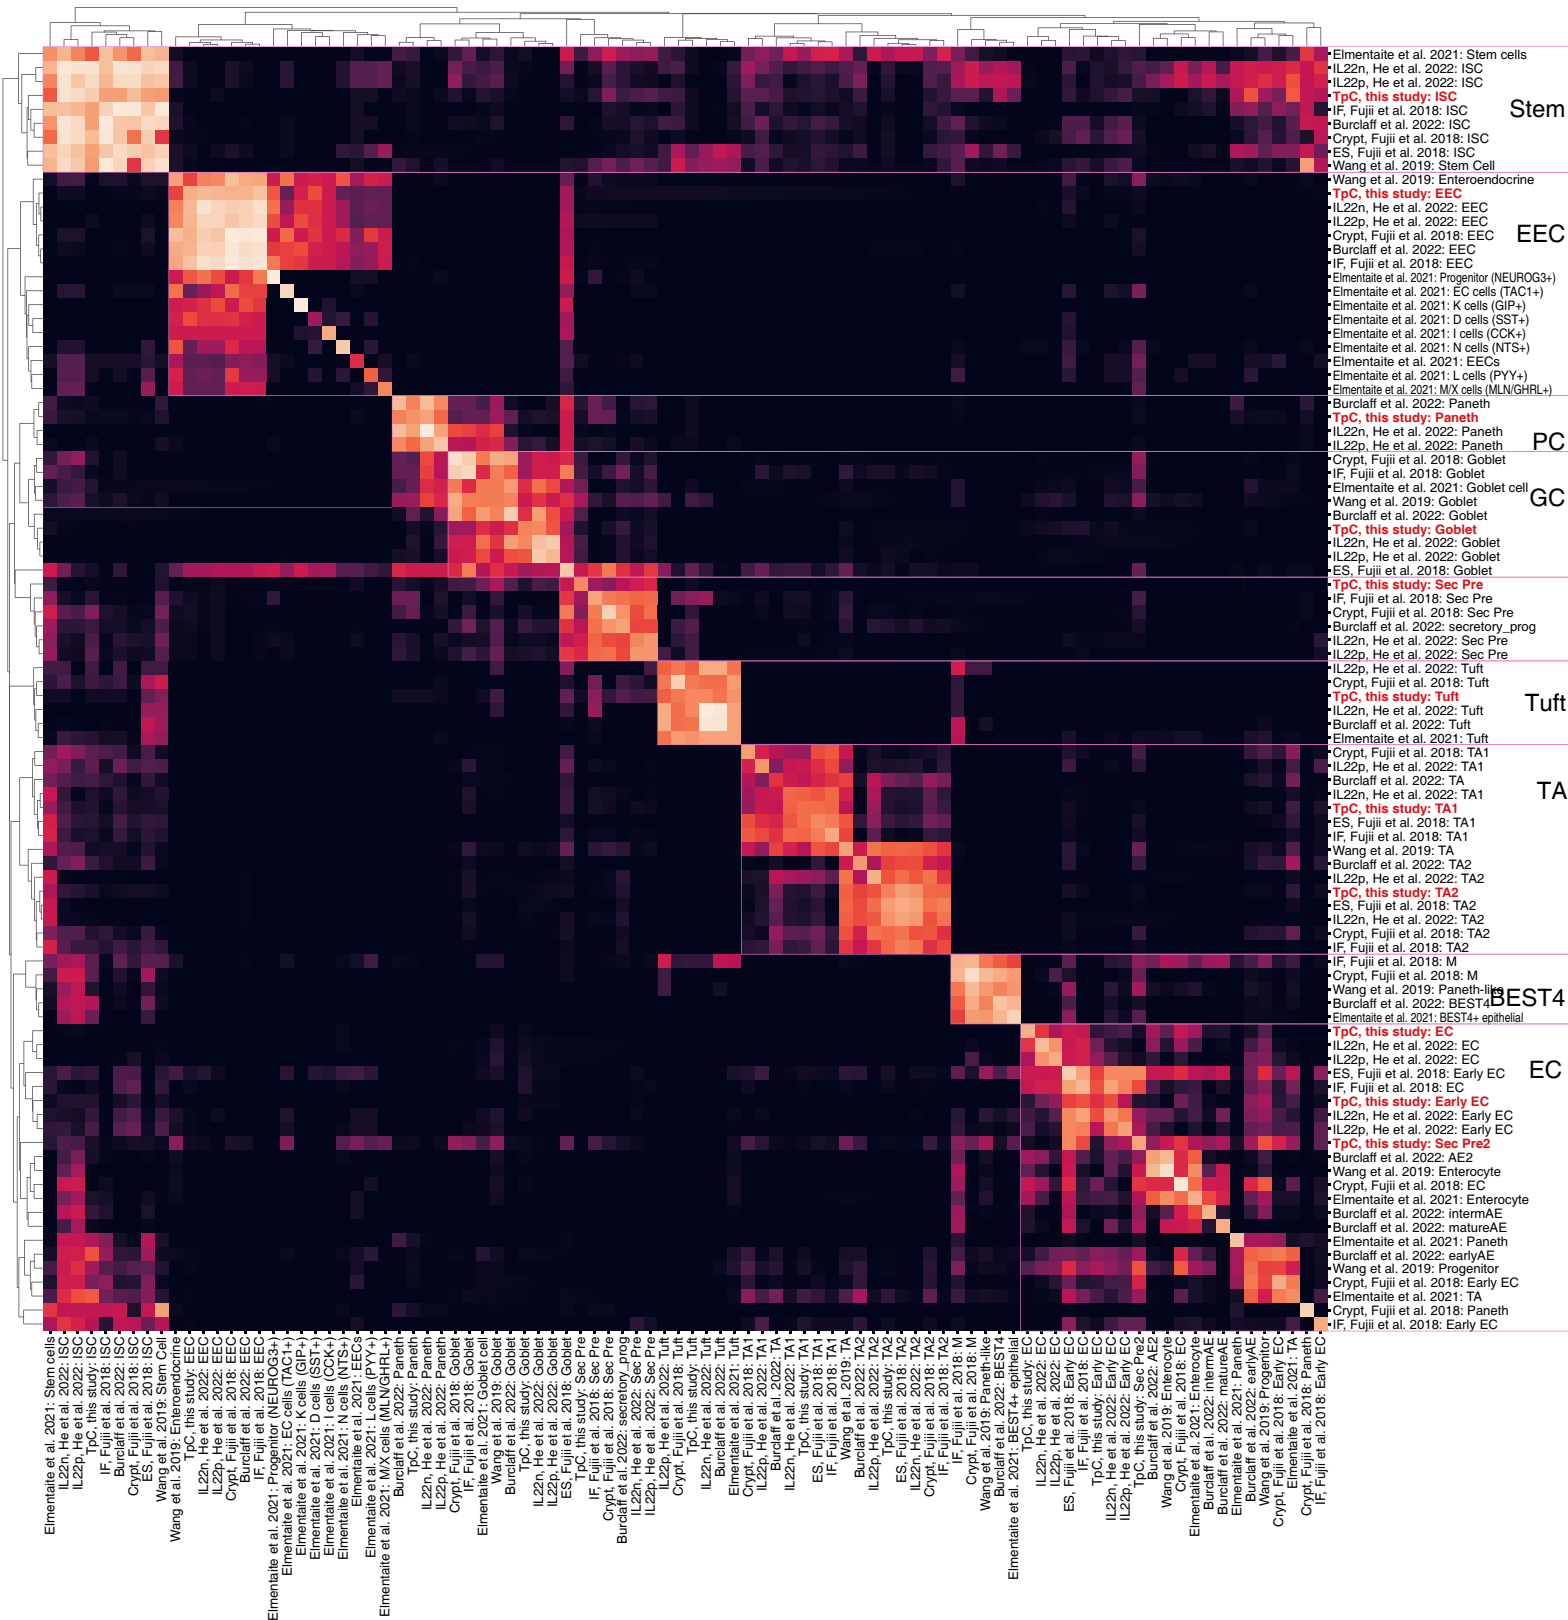

**Supplementary Fig. 8 | Hierarchical clustering of cell types from organoid and *in vivo* datasets using CellHint.**

Heatmap displaying the unsupervised hierarchical clustering of cell types based on their inferred similarities by CellHint. Each row or column represents a cell type. The color intensity indicates the degree of similarity between cell types across different datasets.

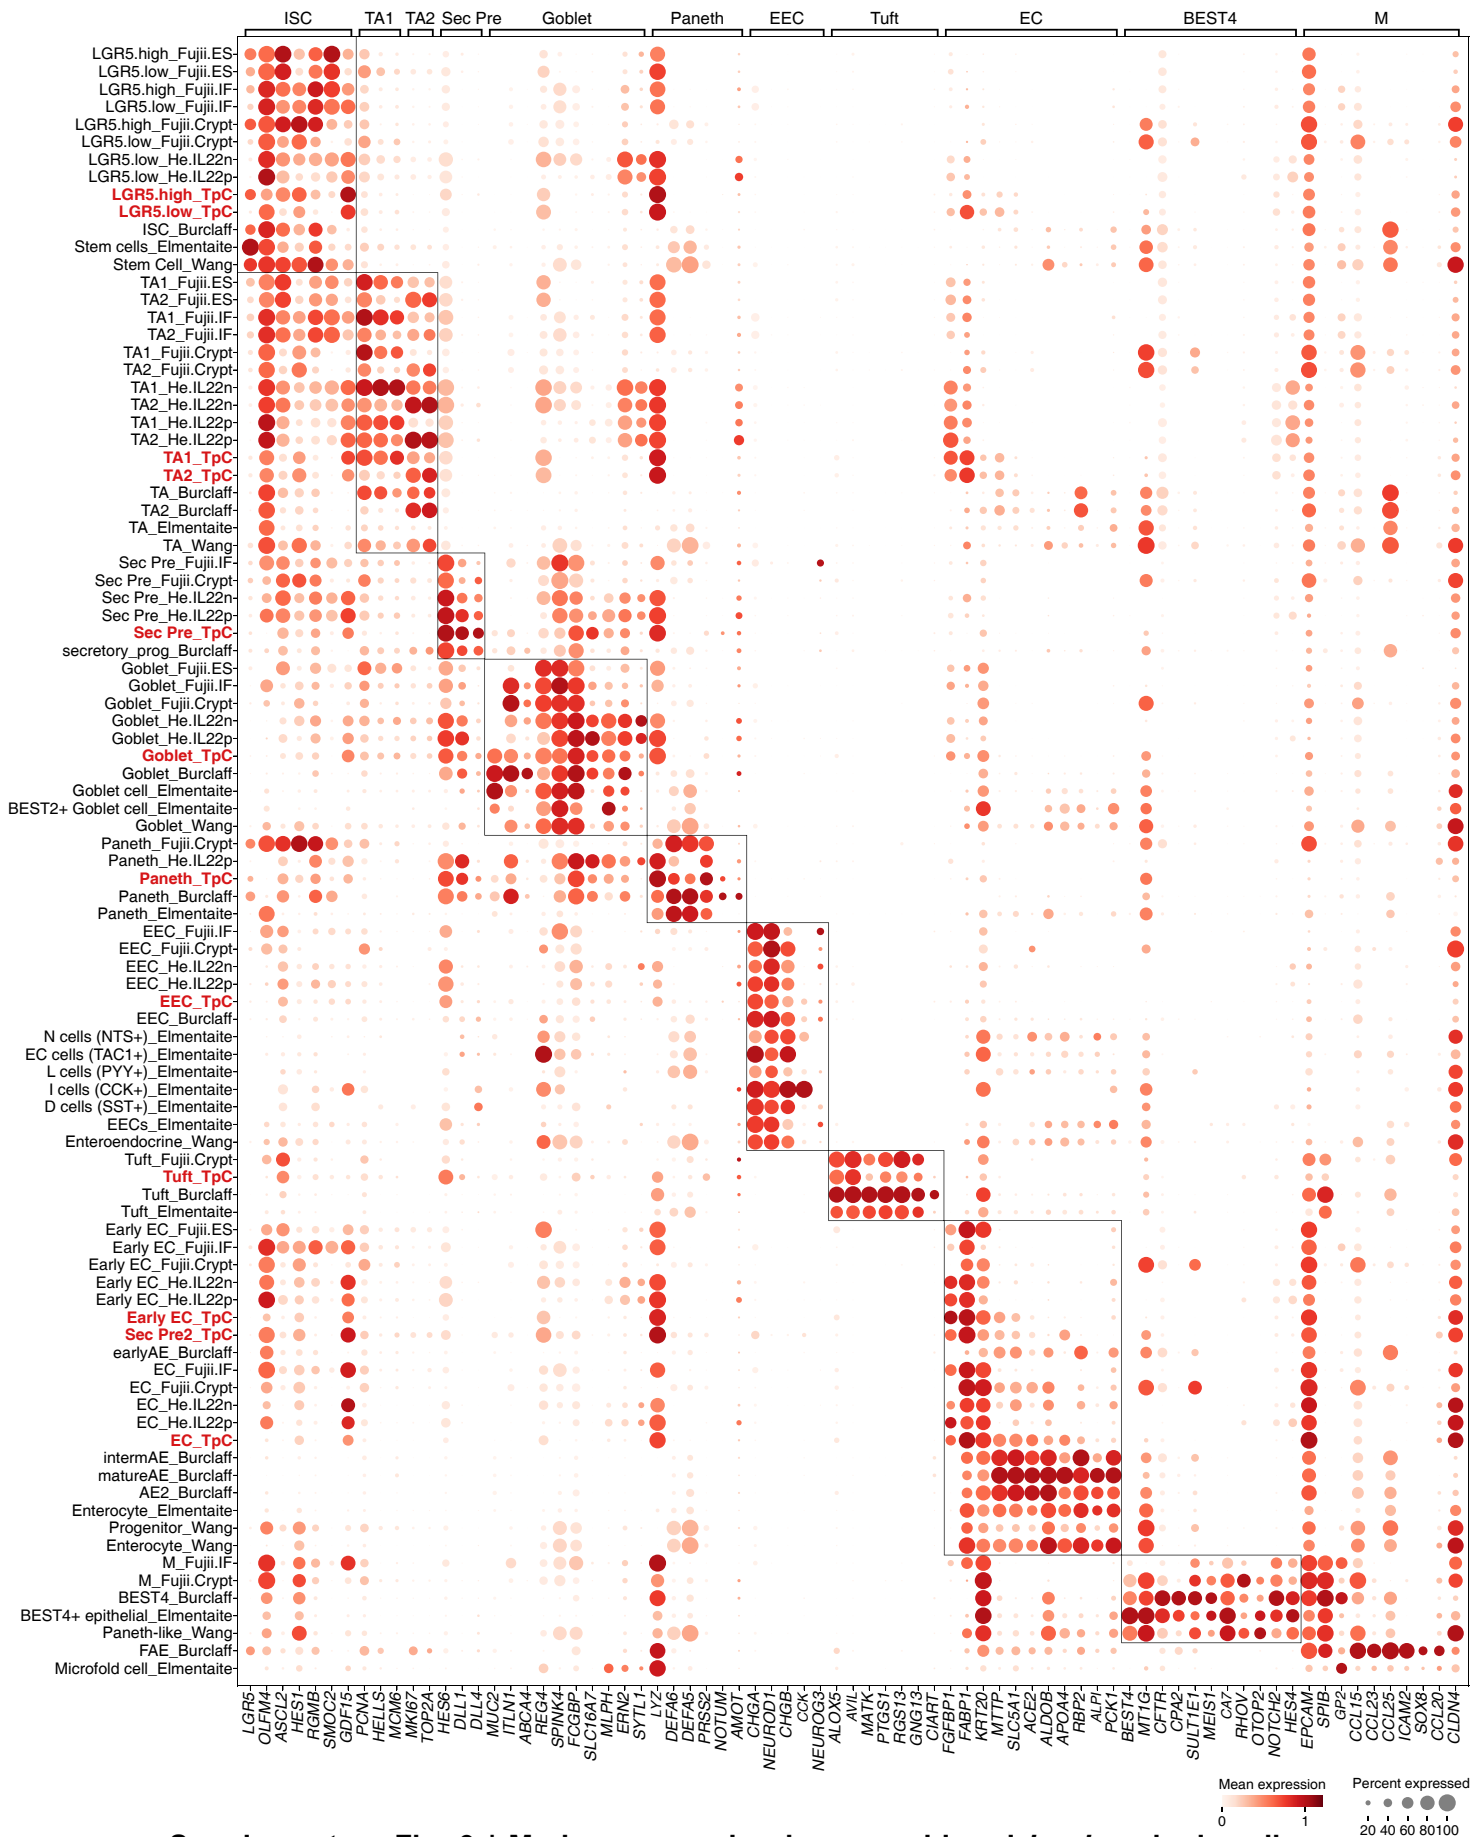

**Supplementary Fig. 9 | Marker expression in organoid and *in vivo* single-cell clusters.**

Dot plot showing the expression and percentage of cells expressing cell type-specific markers in clusters from organoid and *in vivo* datasets. Dot size represents the percentage of cells expressing each marker, while dot color indicates the normalized gene expression level.

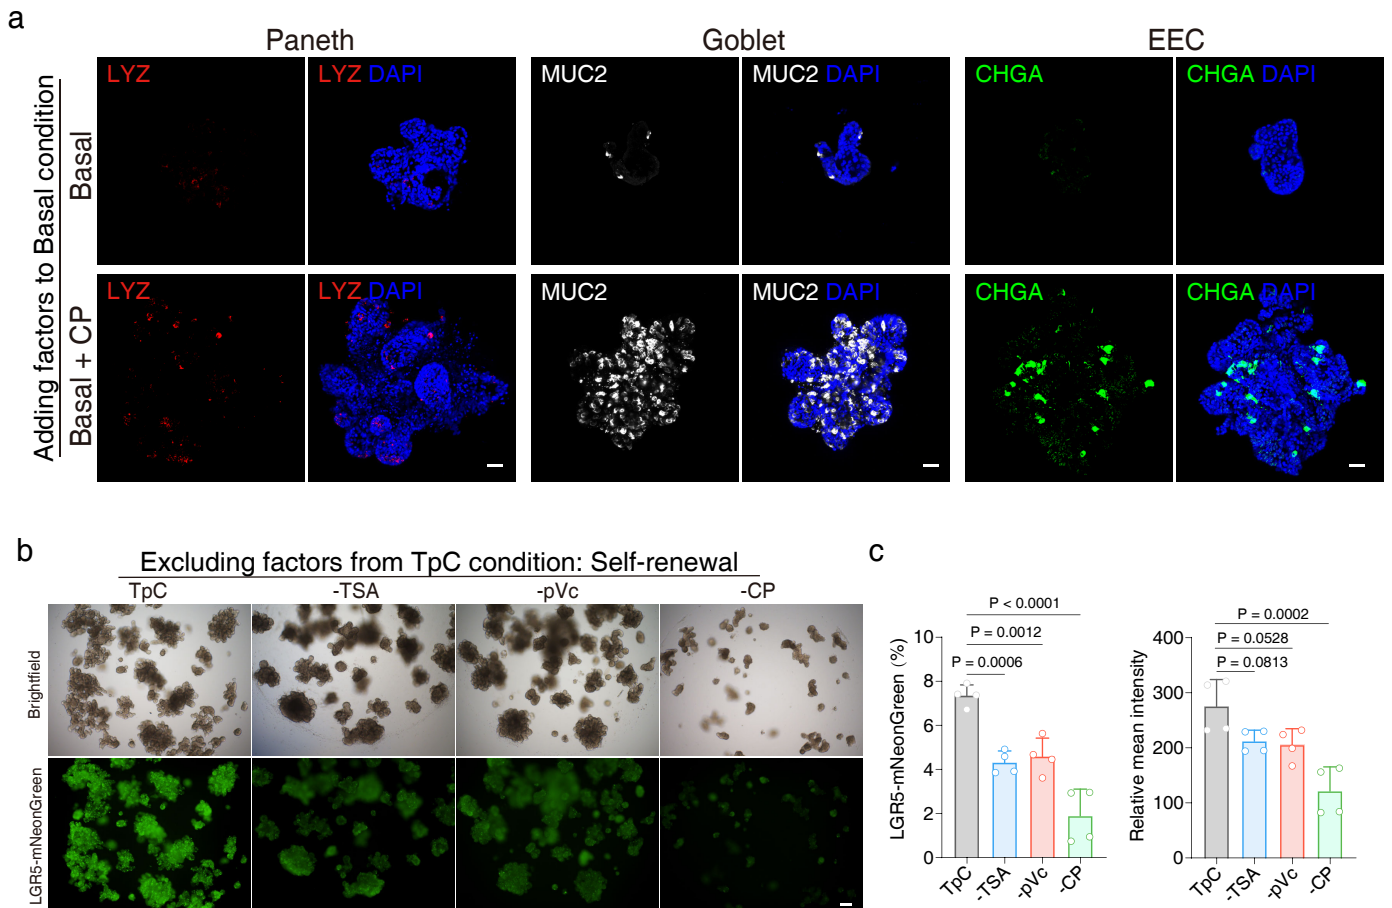

### Supplementary Fig. 10 | TSA, pVc, and CP induce stemness maintenance in organoids.

**a** Representative images of Paneth cells (LYZ), goblet cells (MUC2), and enteroendocrine cells (CHGA) in organoids cultured under Basal conditions or with CP added. Representative images from three independent experiments. Scale bars, 50  $\mu$ m. **b** Brightfield and mNeonGreen fluorescence images of organoids cultured for 28d in conditions as indicated. Representative images from four independent experiments. Scale bar, 200  $\mu$ m. **c** Quantification of LGR5-mNeonGreen proportion and fluorescence intensity in organoids shown in (b). One-way ANOVA with Dunnett's multiple comparisons test compared with the TpC condition; data are presented as mean  $\pm$  SD; representative experiment showing  $n = 4$  samples from each condition. Source data are provided as a Source Data file.

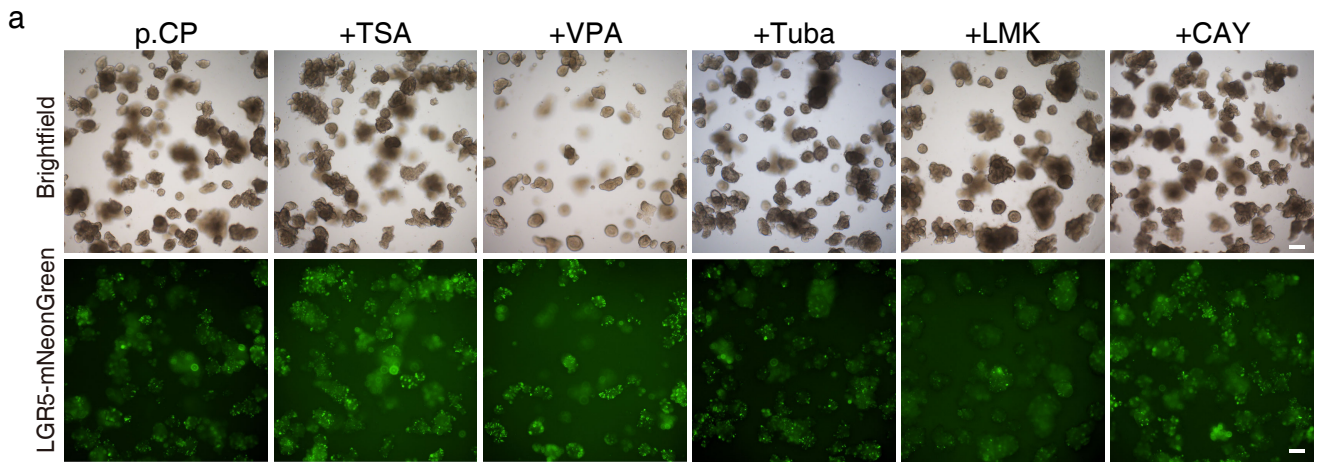

**b**

| Name | Target         | Concentration   |
|------|----------------|-----------------|
| TSA  | Trichostatin A | Pan HDAC 20 nM  |
| VPA  | Valproic Acid  | Pan HDAC 0.5 mM |
| Tuba | Tubastatin A   | HDAC6 1 $\mu$ M |
| LMK  | LMK235         | HDAC4/5 100 nM  |
| CAY  | CAY10683       | HDAC2 1 $\mu$ M |

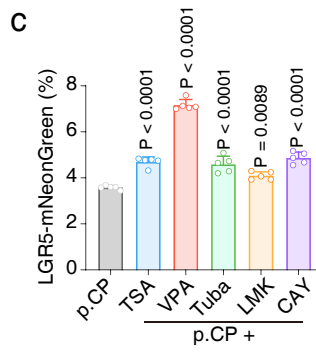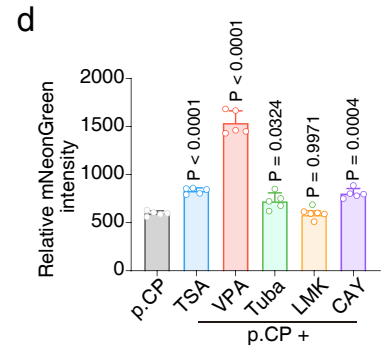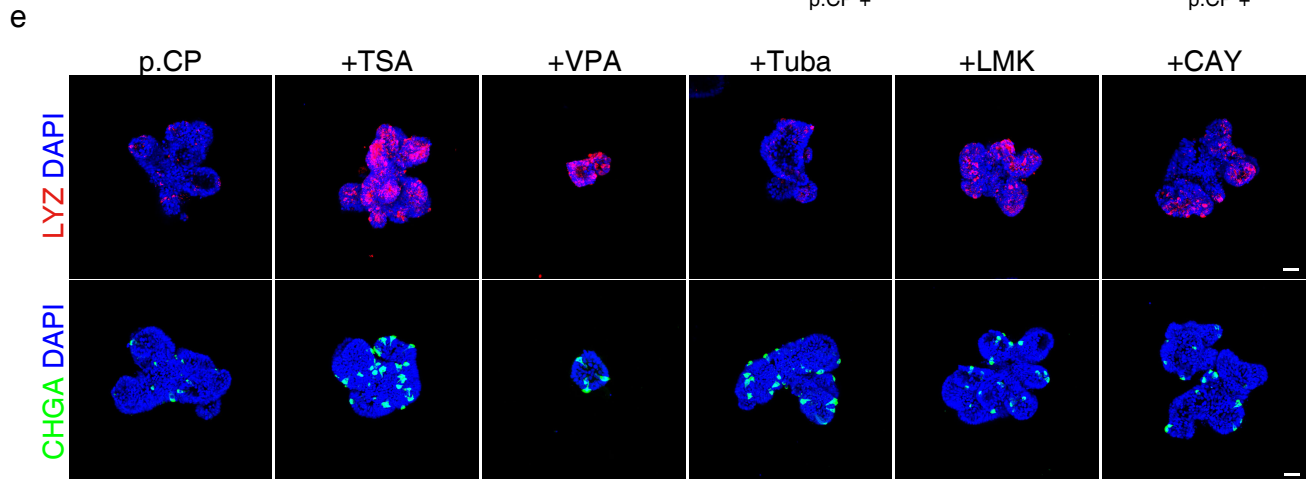

**Supplementary Fig. 11 | Similar effects of HDAC inhibitors and TSA on organoids**

**a** Morphology and fluorescence images of organoids cultured for 10 days from single cells showing the effects of TSA and other HDAC inhibitors. Representative images from five independent experiments. Scale bars, 200  $\mu\text{m}$ . **b** HDAC inhibitors tested as in **(d)**. **c-d** Quantification of LGR5-mNeonGreen percentage **(c)** and relative fluorescence intensity **(d)** in organoid of **(a)**. One-way ANOVA with Dunnett's multiple comparisons test between each test condition with the condition without HDAC inhibitors (p.CP); data are presented as mean  $\pm$  SD; representative experiment showing  $n = 5$  samples from each condition. **e** Representative confocal images of Paneth cells and enteroendocrine cells in organoids cultured in conditions as indicated. Representative images from three independent experiments. Scale bars, 50  $\mu\text{m}$ . Source data for this Figure are provided as a Source Data file.



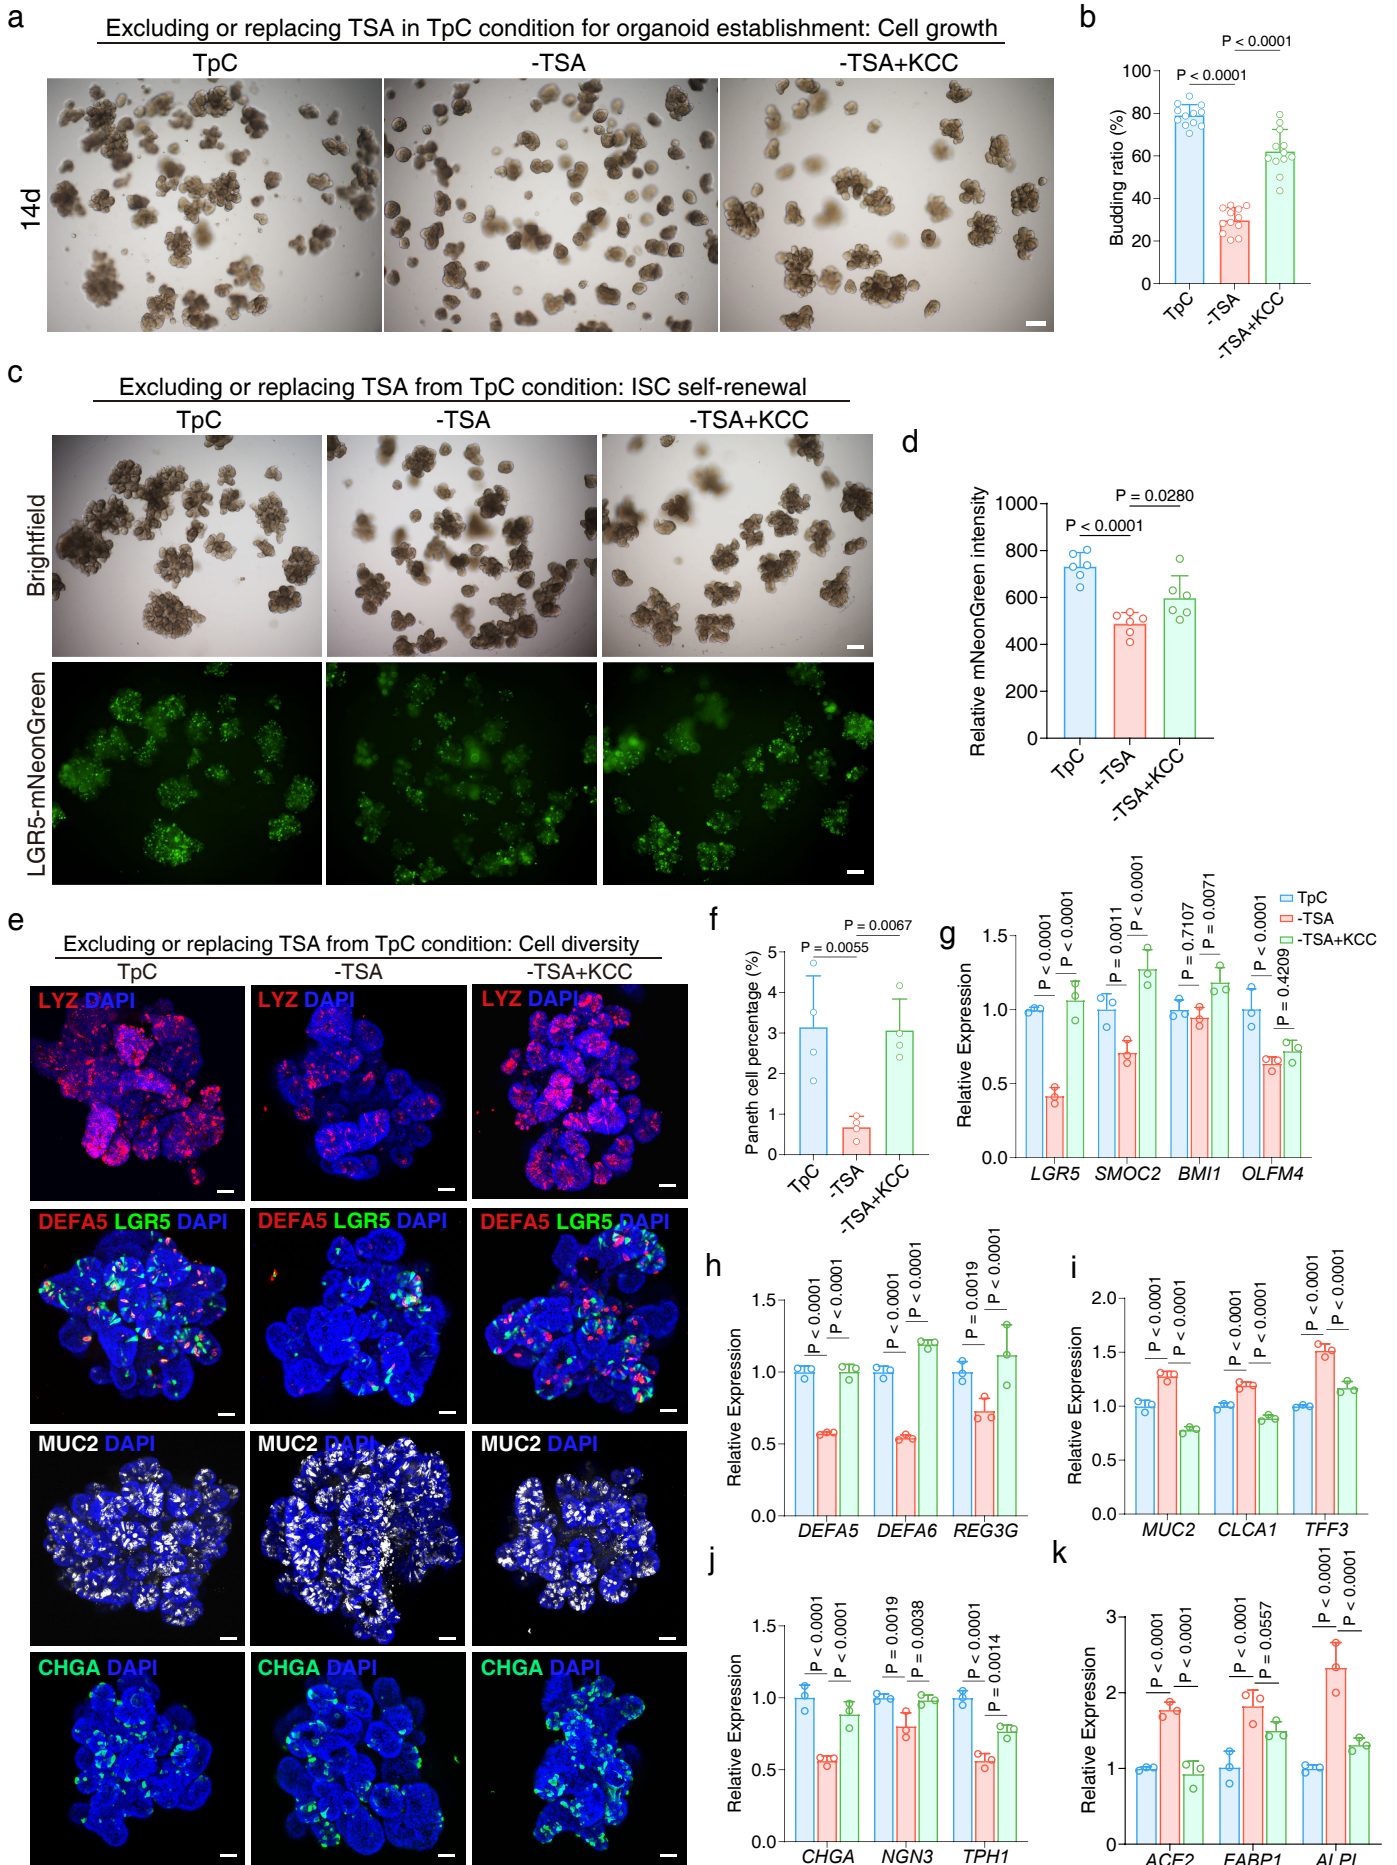

## Supplementary Fig. 12 | MBD2 inhibitor KCC-07 presents similar effects as TSA

**a** Morphology images of organoids cultured for 14 days from single cells in conditions as indicated. KCC-07 (KCC): 10  $\mu\text{m}$ . Representative images from six independent experiments. Scale bars: 200  $\mu\text{m}$ . **b** Quantification of budding ratio in organoid of (**a**). One-way ANOVA with Dunnett's multiple comparisons test between each test condition with TpC condition; data are presented as mean  $\pm$  SD; representative experiment showing  $n = 12$  samples from each condition. **c** Brightfield and fluorescence images of organoids cultured for 28 days in conditions as indicated. Representative images from six independent experiments. Scale bars: 200  $\mu\text{m}$ . **d** Relative fluorescence intensity in organoid of (**c**) were detected by FACS. One-way ANOVA with Dunnett's multiple comparisons test between each test condition and the TpC condition; data are presented as mean  $\pm$  SD; representative experiment showing  $n = 6$  samples from each condition. **e** Representative confocal images of LGR5-mNeonGreen stem cells, Paneth cells (LYZ and DEFA5), goblet cells (MUC2) and enteroendocrine cells (CHGA) in organoids cultured in conditions as indicated. Representative images from three independent experiments. Scale bars: 50  $\mu\text{m}$ . **f** Percentages of Paneth cell in organoids shown in (**e**). One-way ANOVA with Dunnett's multiple comparisons test between each test condition and the pC condition; data are presented as mean  $\pm$  SD; representative experiment showing  $n = 4$  samples from each condition. **g-k** RT-qPCR quantification of markers for stem cell (**g**), Paneth cell (**h**), goblet cell (**i**), EEC (**j**) and EC (**k**) in organoids cultured in TpC, pC (-TSA), or -TSA+KCC conditions. Two-way ANOVA with Dunnett's multiple comparisons test between each condition and the pC condition; data are presented as mean  $\pm$  SD; representative experiment showing  $n = 3$  samples. Source data for this Figure are provided as a Source Data file.

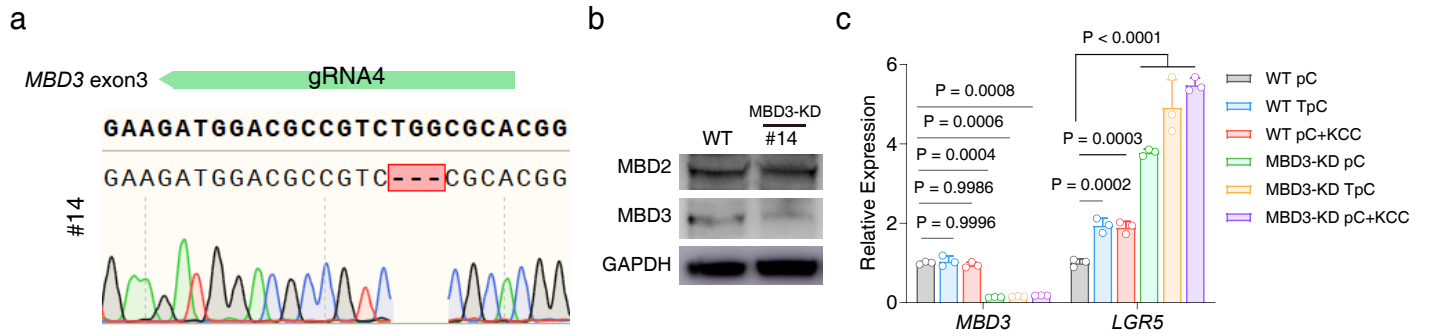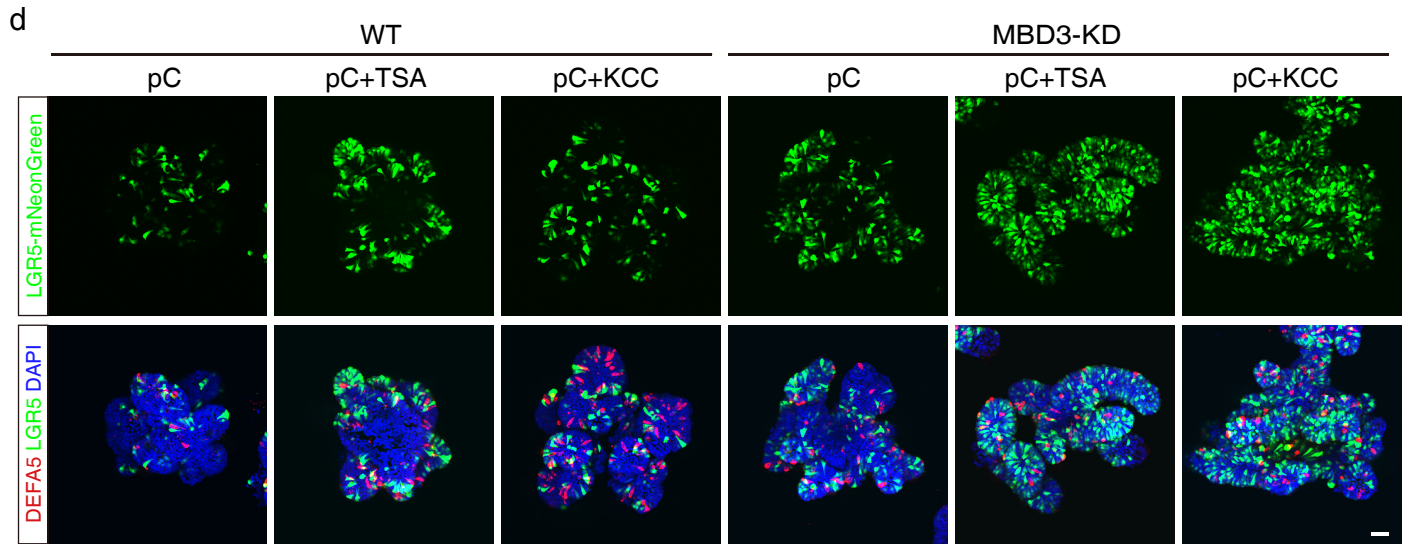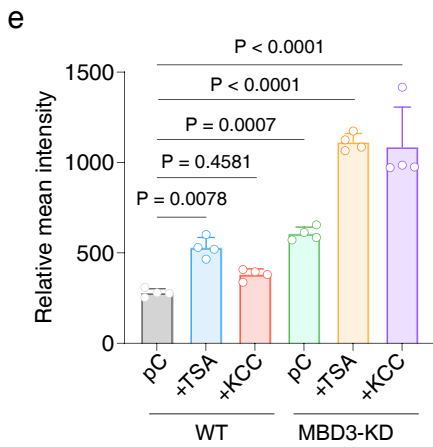

**Supplementary Fig. 13 | Inhibition of MBD3 promotes self-renewal of LGR5 stem cells**

**a** Schematic of the targeting strategy to interfere MBD3 expression. **b** Western blot showing knockdown of MBD3 protein in clone #14. Results reproducible for at least two biological replicates. **c** RT-qPCR quantification of MBD3 and LGR5 expression. Two-way ANOVA with Dunnett's multiple comparisons test; data are presented as mean  $\pm$  SD; representative experiment showing  $n = 3$  samples from each condition. **d** Representative confocal images of LGR5-mNeonGreen stem cells and Paneth cells (DEFA5) in organoids cultured in conditions as indicated. Representative images from three independent experiments. Scale bar, 50 $\mu$ m. **e** Relative fluorescence intensity in organoid of (d). One-way ANOVA with Dunnett's multiple comparisons test; data are presented as mean  $\pm$  SD; representative experiment showing  $n = 4$  samples from each condition. Source data for this Figure are provided as a Source Data file.

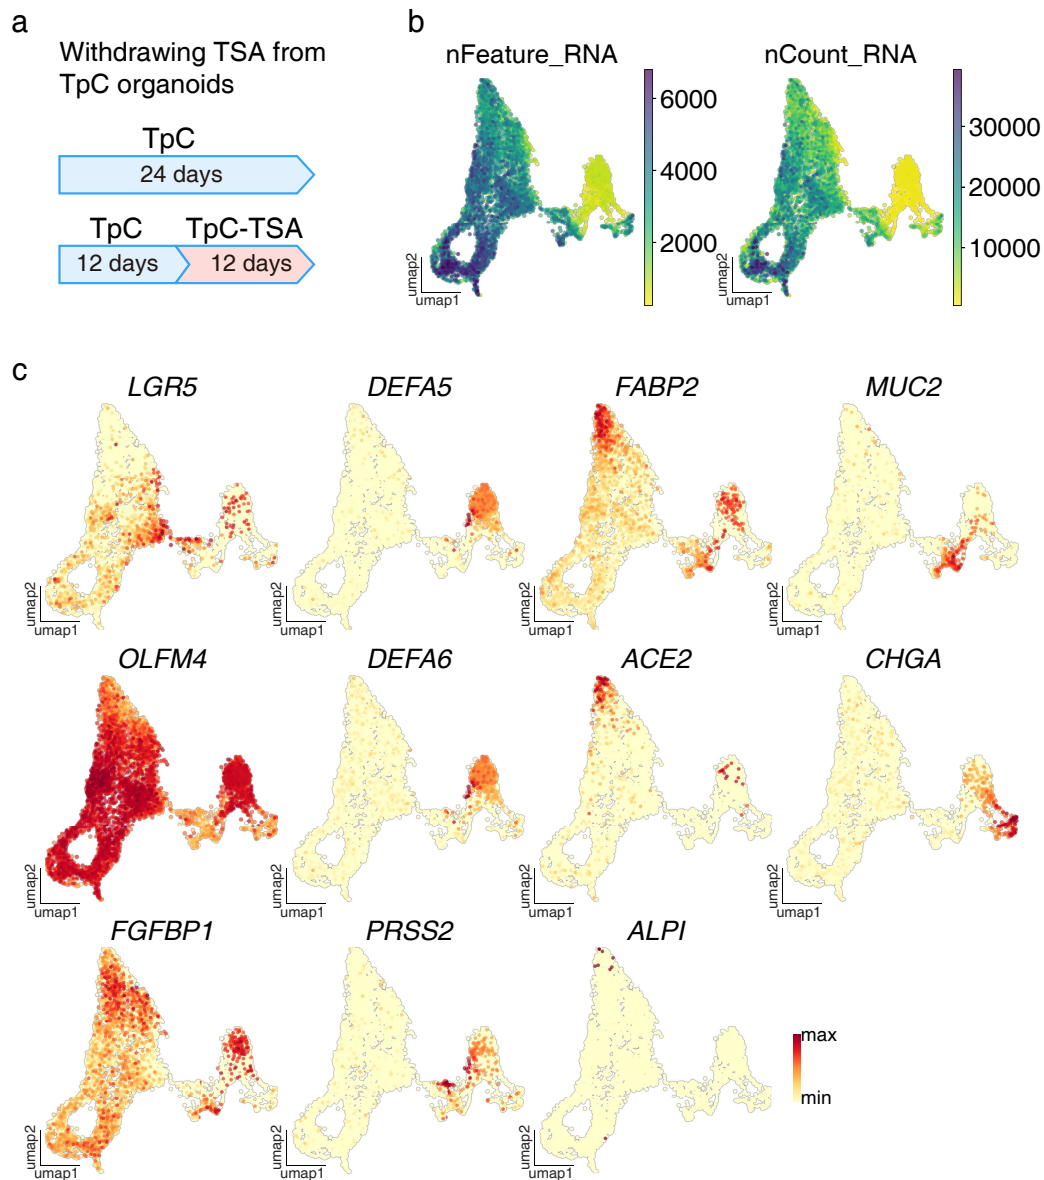

**Supplementary Fig. 14 | Effects of TSA withdrawal on TpC organoids.**

**a** Schematic representation of the experimental design, showing the withdrawal of TSA from TpC organoids. Organoids were cultured in TpC conditions for 24 days or in TpC conditions for 12 days followed by TpC-TSA conditions for another 12 days. **b** UMAP plots showing the distribution of nFeature\_RNA and nCount\_RNA in the organoids. The color gradient represents the number of features (left) and the RNA count (right). **c** UMAP plots displaying the expression patterns of cell type specific marker genes in the organoids after TSA withdrawal. The genes include *LGR5* and *OLFM4* (stem cell marker), *DEFA5*, *DEFA6* and *PRSS2* (Paneth cell markers), *FABP2*, *ACE2* and *ALPI* (enterocyte markers), *MUC2* (goblet cell marker), *CHGA* (enteroendocrine cell marker). The color gradient represents expression levels, from minimum (yellow) to maximum (red).



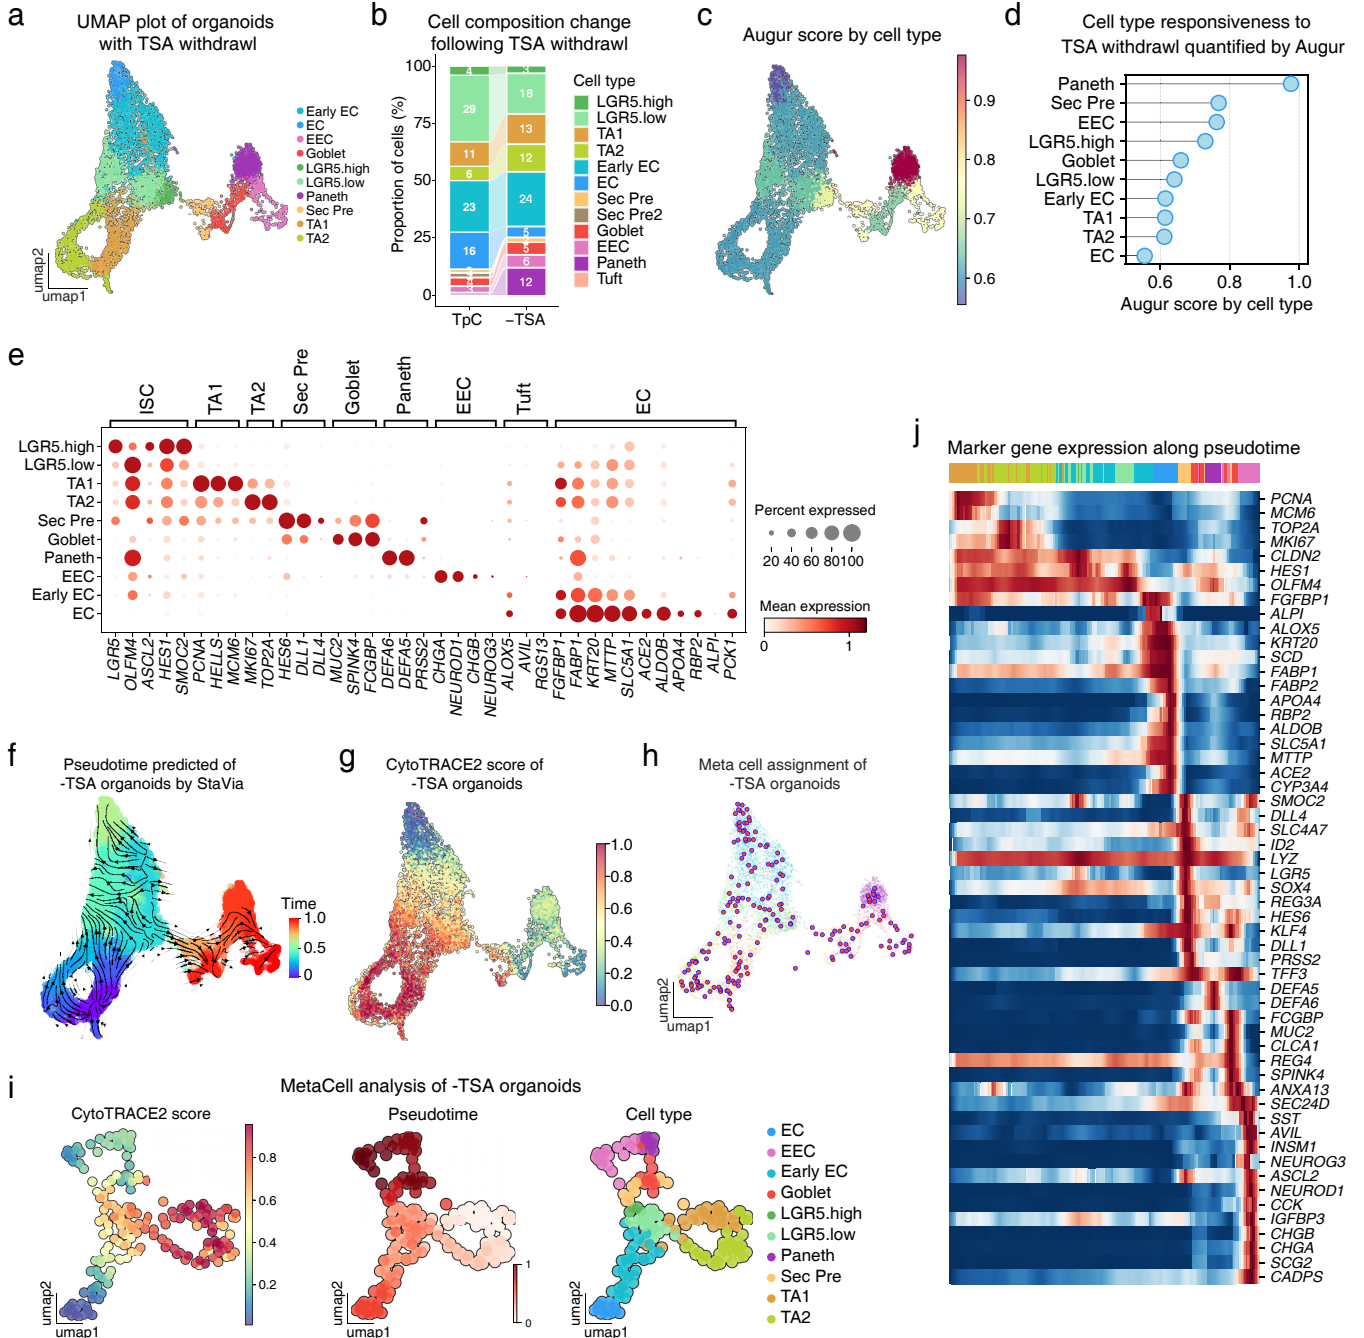



**Supplementary Fig. 15 | Cellular and molecular changes in organoids following TSA withdrawal.**

**a** UMAP plot of -TSA organoids showing distinct cell clusters based on cell type. **b** Bar plot showing the change in cell composition following TSA withdrawal. Proportions of each cell type in TpC and -TSA conditions are indicated. **c** UMAP plot displaying Augur scores by cell type, indicating the cell types' responsiveness to TSA withdrawal. **d** Quantifying cell type responsiveness to TSA removal using Augur scores as in (c). **e** Expression of marker genes across different cell types in -TSA organoids. **f** Pseudotime trajectory of -TSA organoids predicted by StaVia. **g** UMAP plot displaying CytoTRACE2 scores of -TSA organoids. **h** Meta cell assignment of -TSA organoids using SEACells, showing the clustering of cells into distinct meta cells based on transcriptomic similarity. **i** UMAP plots of -TSA organoids showing (from left to right) CytoTRACE2 scores, pseudotime score, and cell type clustering. **j** Heatmap of marker gene expression along pseudotime in -TSA organoids, with genes and cell types indicated. Color bar indicates cell types as in (i). The color gradient represents expression levels from low (blue) to high (red).

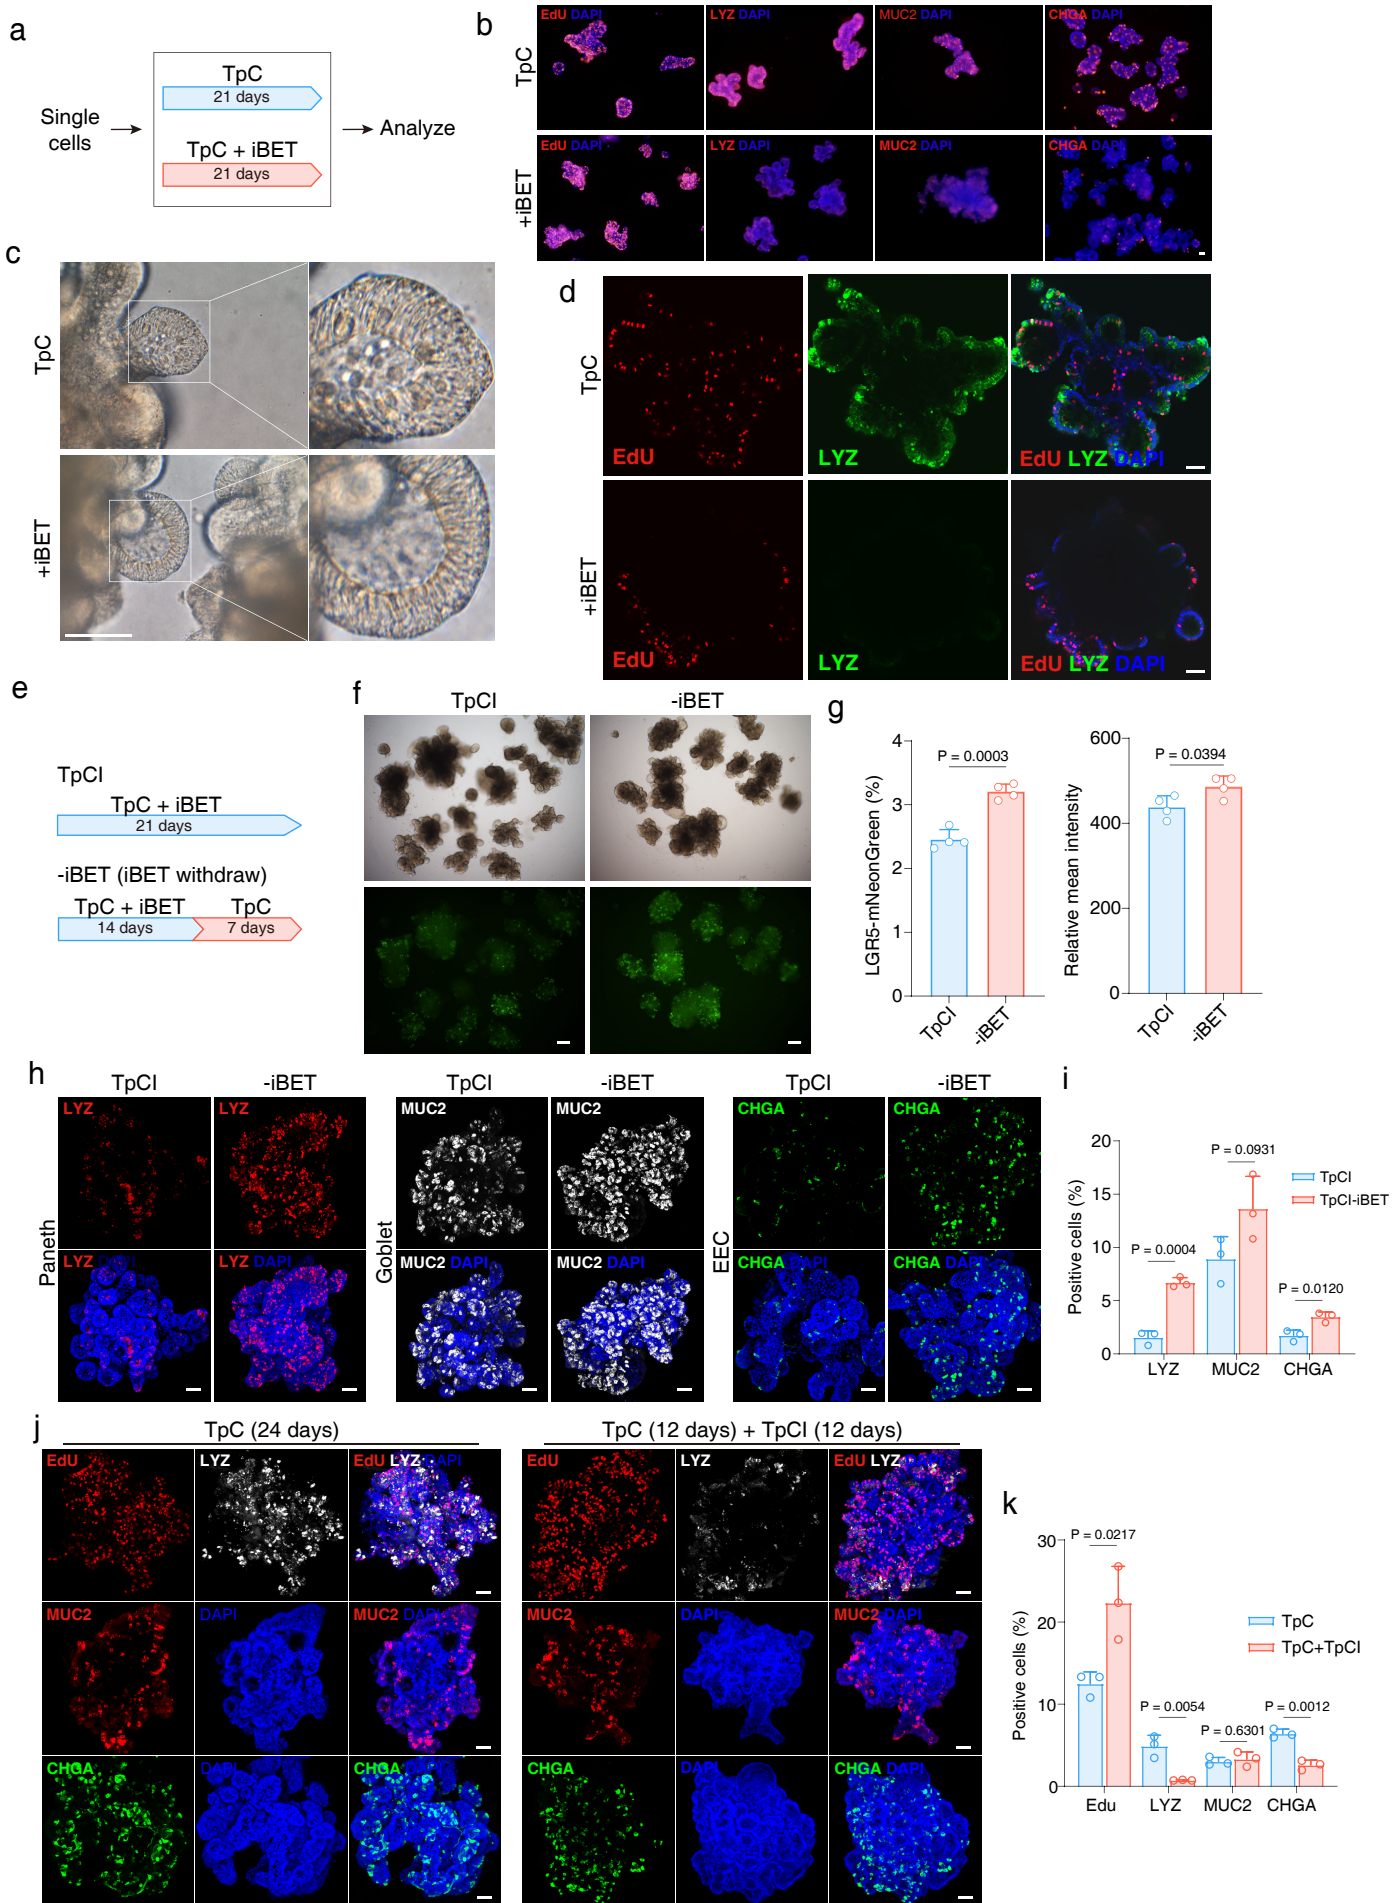

**Supplementary Fig. 16 | iBET-151 promotes proliferation and inhibits differentiation on single cells or established organoids.**

**a** Schematic of organoid culture conditions for experiments in **(b-d)**. **b** EdU and immunofluorescence staining of Paneth cells (LYZ), goblet cells (MUC2), and enteroendocrine cells (CHGA) of organoids cultured in conditions as indicated. **c** Representative images of budding crypts of organoids cultured in conditions as indicated. **d** Co-localization of Paneth cell marker LYZ and EdU in organoids. Representative images of **(a-c)** were from three independent experiments. **e** Schematic of organoid culture conditions for experiments in **(f-i)**. **f** Representative brightfield and LGR5-mNeonGreen fluorescence images of organoids cultured in conditions as indicated. Representative images from four independent experiments. **g** Quantification of LGR5-mNeonGreen cell percentage and relative mean fluorescent intensity of organoids cultured in conditions as indicated. Two-tailed unpaired t-test; data are presented as mean  $\pm$  SD; representative experiment showing  $n = 4$  samples from each condition. **h** EdU and immunofluorescence staining of Paneth cells (LYZ), goblet cells (MUC2), and enteroendocrine cells (CHGA) in organoid cultures as in **(e)**. EdU was administered for 1 hour before staining. **i** Quantification of LYZ, MUC, and CHGA positive cells as shown in **(h)**. Two-tailed unpaired t-test; data are presented as mean  $\pm$  SD;  $n = 3$  samples. **j** EdU and immunofluorescence staining of Paneth cell (LYZ), goblet cell (MUC2), and enteroendocrine (CHGA) staining in organoid cultures as indicated. Representative images of **(h and j)** were from three independent experiments. **k** Quantification of EdU, LYZ, MUC2, and CHGA positive cells in organoids as in **(j)**. Two-tailed unpaired t-test; data are presented as mean  $\pm$  SD;  $n = 3$  samples. Scale bars, **(b, c and f)**, 200  $\mu\text{m}$ ; **(d, h and j)**, 50  $\mu\text{m}$ . Source data for this Figure are provided as a Source Data file.

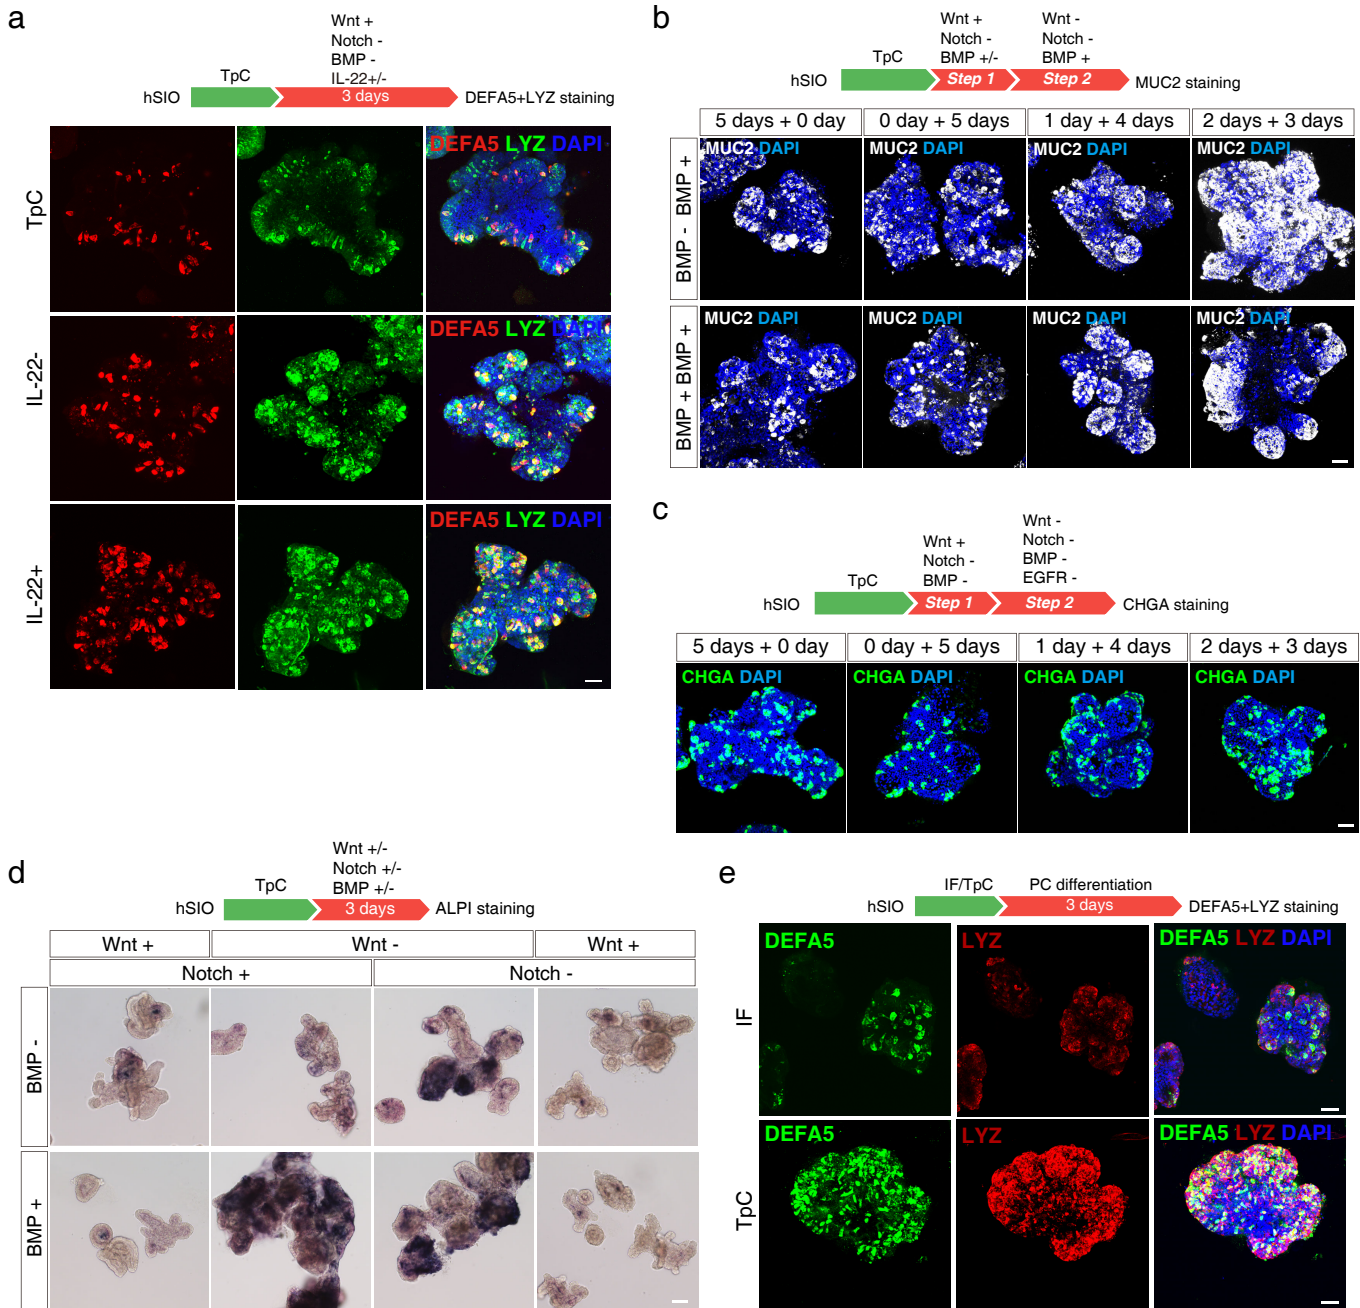

**Supplementary Fig. 17 | Cell fate regulation by combinations of niche signals.**

**a** Representative confocal images showing Paneth cell differentiation (marked by LYZ and DEFA5) in organoids with IL-22 modulation. **b** Representative confocal images showing goblet cell differentiation (marked by MUC2) in organoids with BMP pathway modulation and a stepwise differentiation protocol. **c** Representative confocal images showing enteroendocrine cell differentiation (CHGA) in organoids with a stepwise differentiation protocol. (**a-c**), Scale bars, 50  $\mu$ m. **d** ALPI staining showing enterocyte differentiation in organoids with modulation of Wnt, Notch, and BMP signaling as indicated. Scale bars, 200  $\mu$ m. **e** Representative confocal images showing Paneth cell (DEFA5 and LYZ) in organoids cultured in IF and TpC condition and following induced Paneth cell differentiation for 3 days. All the representative images of this Figure were from three independent experiments. Scale bars, 50  $\mu$ m.

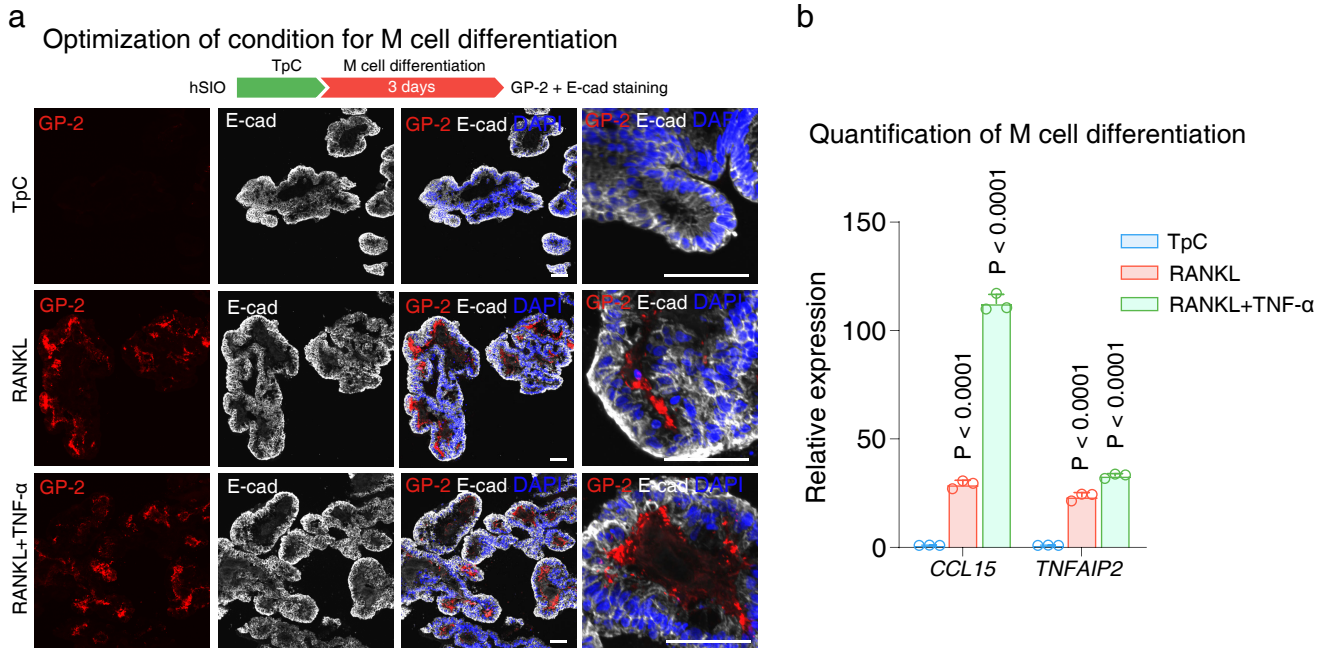

**Supplementary Fig. 18 | Directed differentiation of M cells from TpC organoids.**

**a** Representative confocal images showing M cells differentiation (GP-2) and E-cadherin (E-cad) in organoids with conditions previously published in mouse organoid. Representative images from three independent experiments. Scale bars, 50  $\mu$ m. **b** RT-qPCR quantification of M cell markers *CCL15* and *TNFAIP2* in organoids as in (a). Two-way ANOVA with Dunnett's multiple comparisons test; data are presented as mean  $\pm$  SD; representative experiment showing  $n = 3$  samples from each condition. Source data are provided as a Source Data file.







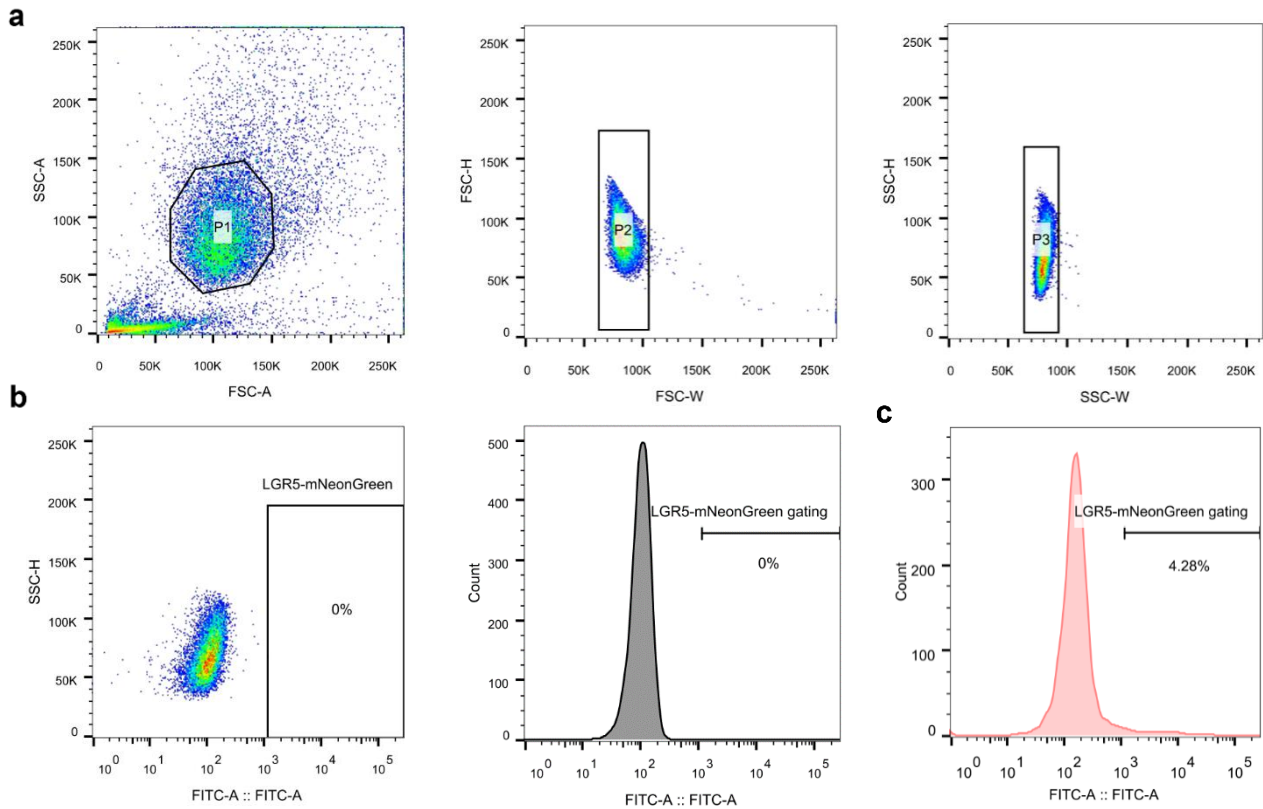

**Supplementary Fig. 20 | Flow cytometry gating strategy.**

**a** Cell selection and debris removal: Dissociated hSIO cells were first identified based on forward scatter (FSC) vs. side scatter (SSC) to remove debris (left panel). Subsequently, doublets were excluded by evaluating FSC-height (FSC-H) vs. FSC-width (FSC-W) (medium panel) and SSC-height (FSC-H) vs. SSC-width (SSC-W) (right panel). **b** Gating LGR5-mNeonGreen population in Non-reporter hSIO cells: in hSIO cells without mNeonGreen reporter expression, LGR5-mNeonGreen population were gated based on their FITC fluorescence intensity. **c** Gating LGR5 population in mNeonGreen reporter hSIO as an example: for LGR5-mNeonGreen hSIO cells, the LGR5-mNeonGreen gate established in step (b) were applied. The LGR5 population was further selected by assessing FITC fluorescence from the mNeonGreen reporter.

**Supplementary Table 1 | CRISPR target sites, homology arms, knock-in sequence and PCR primers used in the study.**

| Target Gene   | gRNA location (human hg38)   | gRNA Sequences (5' to 3') |
|---------------|------------------------------|---------------------------|
| <i>LGR5-1</i> | chr12: 71,584,804-71,584,823 | 1#: GTAATTAATAAGAAGAGCTG  |
| <i>LGR5-2</i> | chr12: 71,584,726-71,584,745 | 2#: TGTCTCTAATTAATATGTGA  |
| <i>MBD3-4</i> | chr19: 1,584,627-1,584,646   | 4#: GATGGACGCCGTCTGGCGCA  |

| Homology arms      | Genomic location (human hg38) | Span (bp) |
|--------------------|-------------------------------|-----------|
| <i>LGR5-5'</i> arm | chr12: 71,583,717-71,584,731  | 1015      |
| <i>LGR5-3'</i> arm | chr12: 71,584,732-71,585,979  | 1248      |

| LGR5-mNeonGreen KI | Sequence (5'-3') (P2A+mNeonGreen)                                                                                                                                                                                                                                                                                                                                                                                                                                                                                                                                                                                                                                                                                                                                                                                                                                                                                      |
|--------------------|------------------------------------------------------------------------------------------------------------------------------------------------------------------------------------------------------------------------------------------------------------------------------------------------------------------------------------------------------------------------------------------------------------------------------------------------------------------------------------------------------------------------------------------------------------------------------------------------------------------------------------------------------------------------------------------------------------------------------------------------------------------------------------------------------------------------------------------------------------------------------------------------------------------------|
|                    | <p><b>GCAACAAACTTCTCTCTGCTGAAACAAGCCGGAGATGTCTGAAG<br/> AGAATCCTGGACCGATGGTGAGCAAGGGCGAGGAGGATAACAT<br/> GGCCTCTCTCCCAGCGACACATGAGTTACACATCTTTGGCTCCAT<br/> CAACGGTGTGGACTTTGACATGGTGGGTCAGGGCACCGGCAAT<br/> CCAAATGATGGTTATGAGGAGTTAAACCTGAAGTCCACCAAGGGT<br/> GACCTCCAGTTCTCCCCCTGGATTCTGGTCCCTCATATCGGGTAT<br/> GGCTTCCATCAGTACCTGCCCTACCCTGACGGGATGTGCGCTTT<br/> CCAGGCCGCCATGGTAGATGGCTCCGGCTACCAAGTCCATCGCA<br/> CAATGCAGTTTGAAGATGGTGCCTCCCTTACTGTTAACTACCGCT<br/> ACACCTACGAGGGAAGCCACATCAAAGGAGAGGCCAGGTGAA<br/> GGGGACTGGTTTCCCTGCTGACGGTCCCTGTGATGACCAACTCGC<br/> TGACCGCTGCGGACTGGTGCAGGTGGAAGAAGACTTACCCCAA<br/> CGACAAAACCATCATCAGTACCTTTAAGTGGAGTTACACCACTGG<br/> AAATGGCAAGCGCTACCGGAGCACTGCGCGGACCACCTACACC<br/> TTTGCCAAGCCAATGGCGGCTAACTATCTGAAGAACCAGCCGAT<br/> GTACGTGTTCCGTAAGACGGAGCTCAAGCACTCCAAGACCGAGC<br/> TCAACTTCAAGGAGTGGCAAAAAGGCCTTTACCGATGTGATGGGC<br/> ATGGACGAGCTGTACAAGTAA</b></p> |

| LGR5-KI | PCR primers | Sequences (5' to 3')           |
|---------|-------------|--------------------------------|
|         | F1          | TGGCATCCTAAATAAAGAGACAAAAGGGTA |
|         | R1          | GTGCGATGGACTTGGTAGCC           |
|         | F2          | TCCCTGCTGACGGTCCTGT            |
|         | R2          | CTTAAATAGCAGGCCGGGCG           |
|         | F3          | AGCCTGAGAAAGCAAACC             |
|         | R3          | TCTGAGGAAAGGCAAAGG             |

**Supplementary Table 2 | Proteins and small molecules used in this study.**

| <b>Name</b>                                    | <b>Source</b> | <b>Identifier</b> |
|------------------------------------------------|---------------|-------------------|
| Recombinant Murine EGF                         | Peprotech     | Cat#315-09        |
| Recombinant Human IGF-I                        | Peprotech     | Cat#100-11        |
| Recombinant Human FGF-basic                    | Peprotech     | Cat#100-18C       |
| DMH1                                           | ApexBio       | Cat#B3686         |
| Gastrin I                                      | MCE           | Cat#HY-P1097      |
| A83-01                                         | ApexBio       | Cat#A3133         |
| CHIR-99021 (CHIR)                              | ApexBio       | Cat#A3011         |
| Trichostatin A (TSA)                           | ApexBio       | Cat#A8183         |
| 2-phospho-L-ascorbic acid trisodium salt (pVc) | Sigma         | Cat#49752         |
| CP673451 (CP)                                  | TargetMol     | Cat#T6091         |
| Y-27632 dihydrochloride                        | TargetMol     | Cat#T1725         |
| Valproic acid sodium salt (VPA)                | Sigma         | Cat#P4543         |
| Tubastatin A HCl                               | ApexBio       | Cat#A8547         |
| LMK235                                         | TargetMol     | Cat#T6061         |
| CAY10683                                       | Selleck       | Cat#S7595         |
| Gefitinib                                      | TargetMol     | Cat#T1181         |
| DAPT                                           | TargetMol     | Cat#T6202         |
| IWR-1                                          | TargetMol     | Cat#T2651         |
| SJ000291942                                    | TargetMol     | Cat#T4662         |
| iBET151                                        | Selleck       | Cat#S2780         |
| KCC-07                                         | TargetMol     | Cat#T8554         |
| Recombinant human IL-22                        | PrimeGene     | Cat#101-22        |
| Recombinant human RANKL                        | Peprotech     | Cat#310-01        |
| Recombinant human TNF- $\alpha$                | Peprotech     | Cat#300-01A       |

### Supplementary Table 3 | Antibodies used in this study.

| Antibody                                            | Vendor      | Identifier                       |
|-----------------------------------------------------|-------------|----------------------------------|
| Rabbit anti-Lysozyme                                | Invitrogen  | Cat#PA5-16668, RRID:AB_10984852  |
| Mouse anti-Chr-A (C-12)                             | Santa Cruz  | Cat#sc-393941, RRID:AB_2801371   |
| Mouse anti-Mucin 2 (Ccp58)                          | Santa Cruz  | Cat#sc-7314, RRID:AB_627970      |
| Mouse anti- $\alpha$ -defensin 5 (8c8)              | Santa Cruz  | Cat#sc-53997, RRID:AB_2091709    |
| Rabbit anti-OLFM4(D1E4M)                            | CST         | Cat#14369, RRID:AB_2798465       |
| Rat anti-Somatostatin, Clone YC7                    | Millipore   | Cat#MAB354, RRID:AB_2255365      |
| Mouse anti-Glucagon (C-11)                          | Santa Cruz  | Cat#sc-514592, RRID:AB_2629431   |
| Mouse anti-GP2                                      | MBL         | Cat#D277-3, RRID:AB_10598500     |
| Rabbit anti-E-cadherin                              | Proteintech | Cat#20874-1-AP, RRID:AB_10697811 |
| Mouse anti-MBD2/3 (D-7)                             | Santa Cruz  | Cat#sc-271562, RRID:AB_10659107  |
| Rabbit anti-GAPDH (D16H11)                          | CST         | Cat#5174T, RRID:AB_10622025      |
| Mouse anti-ALPI                                     | Santa Cruz  | Cat#sc-271431, RRID:AB_10649489  |
| Donkey anti-Mouse IgG (H+L), Alexa Fluor™ Plus 488  | Invitrogen  | Cat#A32766, RRID:AB_2762823      |
| Donkey anti-Rabbit IgG (H+L), Alexa Fluor™ Plus 488 | Invitrogen  | Cat#A32790, RRID:AB_2762833      |
| Donkey anti-Mouse IgG (H+L), Alexa Fluor™ Plus 555  | Invitrogen  | Cat#A32773, RRID:AB_2762848      |
| Donkey anti-Rabbit IgG (H+L), Alexa Fluor™ Plus 555 | Invitrogen  | Cat#A32794, RRID:AB_2762834      |
| Goat anti-Rat IgG (H+L), Alexa Fluor™ 555           | Invitrogen  | Cat#A-21434, RRID:AB_2535855     |
| Donkey anti-Rabbit IgG (H+L), Alexa Fluor™ Plus 647 | Invitrogen  | Cat#A32795, RRID:AB_2762835      |
| Donkey anti-Mouse IgG (H+L), Alexa Fluor™ 647       | Invitrogen  | Cat#A-31571, RRID:AB_162542      |

**Supplementary Table 4 | Primers used for quantitative RT-PCR.**

| <b>Genes</b>   | <b>Primer Sequences (5' to 3')</b>                    |
|----------------|-------------------------------------------------------|
| <i>GAPDH</i>   | F-GGAGCGAGATCCCTCCAAAAT<br>R-GGCTGTTGTCATACTTCTCATGG  |
| <i>LGR5</i>    | F-CTCCCAGGTCTGGTGTGTTG<br>R-GAGGTCTAGGTAGGAGGTGAAG    |
| <i>OLFM4</i>   | F-ACTGTCCGAATTGACATCATGG<br>R-TTCTGAGCTTCCACCAAACTC   |
| <i>BMI1</i>    | F-CGTGTATTGTTTCGTTACCTGGA<br>R-TTCAGTAGTGGTCTGGTCTTGT |
| <i>LYZ</i>     | F-CTTGTCTCCTTTCTGTTACGG<br>R-CCCCTGTAGCCATCCATTCC     |
| <i>DEFA5</i>   | F-AGACAACCAGGACCTTGCTAT<br>R-GGAGAGGGACTCACGGGTAG     |
| <i>DEFA6</i>   | F-CTGAGCCACTCCAAGCTGAG<br>R-GTTGAGCCCAAAGCTCTAAGAC    |
| <i>REG3G</i>   | F-GGTGAGGAGCATTAGTAACAGC<br>R-CCAGGGTTTAAGATGGTGGAGG  |
| <i>MUC2</i>    | F-GAGGGCAGAACCCGAAACC<br>R-GGCGAAGTTGTAGTCGCAGAG      |
| <i>CLCA1</i>   | F-ACAACAATGGCTATGAAGGCA<br>R-GGTCTCAAGTTTTGGTCTCACAT  |
| <i>CHGA</i>    | F-TAAAGGGGATACCGAGGTGATG<br>R-TCGGAGTGTCTCAAAACATTCC  |
| <i>SST</i>     | F-ACCCAACCAGACGGAGAATGA<br>R-GCCGGGTTTGAGTTAGCAGA     |
| <i>GCG</i>     | F-CTGAAGGGACCTTTACCAGTGA<br>R-CCTGGCGGCAAGATTATCAAG   |
| <i>NEUROG3</i> | F-CTAAGAGCGAGTTGGCACTGA<br>R-GAGGTTGTGCATTTCGATTGCG   |
| <i>ALPI</i>    | F-TGAGGGTGTGGCTTACCAG<br>R-GATGGACGTGTAGGCTTTGCT      |
| <i>SMOC2</i>   | F-TTCTCGGCGCTCACGTTTTT<br>R-GTTGAAATTCACAACGGGAAAGG   |
| <i>TFF3</i>    | F-CCAAGCAAACAATCCAGAGCA<br>R-GCTCAGGACTCGCTTCATGG     |
| <i>TPH1</i>    | F-ACGTCAAAGTATTTTGCGGA<br>R-ACGGTTCCCCAGGTCTTAATC     |

|                |                                                    |
|----------------|----------------------------------------------------|
| <i>ACE2</i>    | F-CGAAGCCGAAGACCTGTTCTA<br>R-GGGCAAGTGTGGACTGTTCC  |
| <i>FABP1</i>   | F-ATGAGTTTCTCCGGCAAGTACC<br>R-CTCTTCCGGCAGACCGATTG |
| <i>CCL15</i>   | F-TCCCAGGCCAGTTCATAAAT<br>R-TGCTTTGTGAGATGTAGGAGGT |
| <i>TNFAIP2</i> | F-GGCCAATGTGAGGGAGTTGAT<br>R-CCCGCTTTATCTGTGAGCCC  |
| <i>MBD3</i>    | F-CTGAGCACCTTCGACTTCCG<br>R-CCGGCTGCTTGAAGATGGA    |

---
